# Supplementary material
Source: PubMed Central journal article supplement (PMC9546059)
Supplement: NIHMS1838505-supplement-Supp.pdf [file NIHMS1838505-supplement-Supp.pdf]

## Supporting information

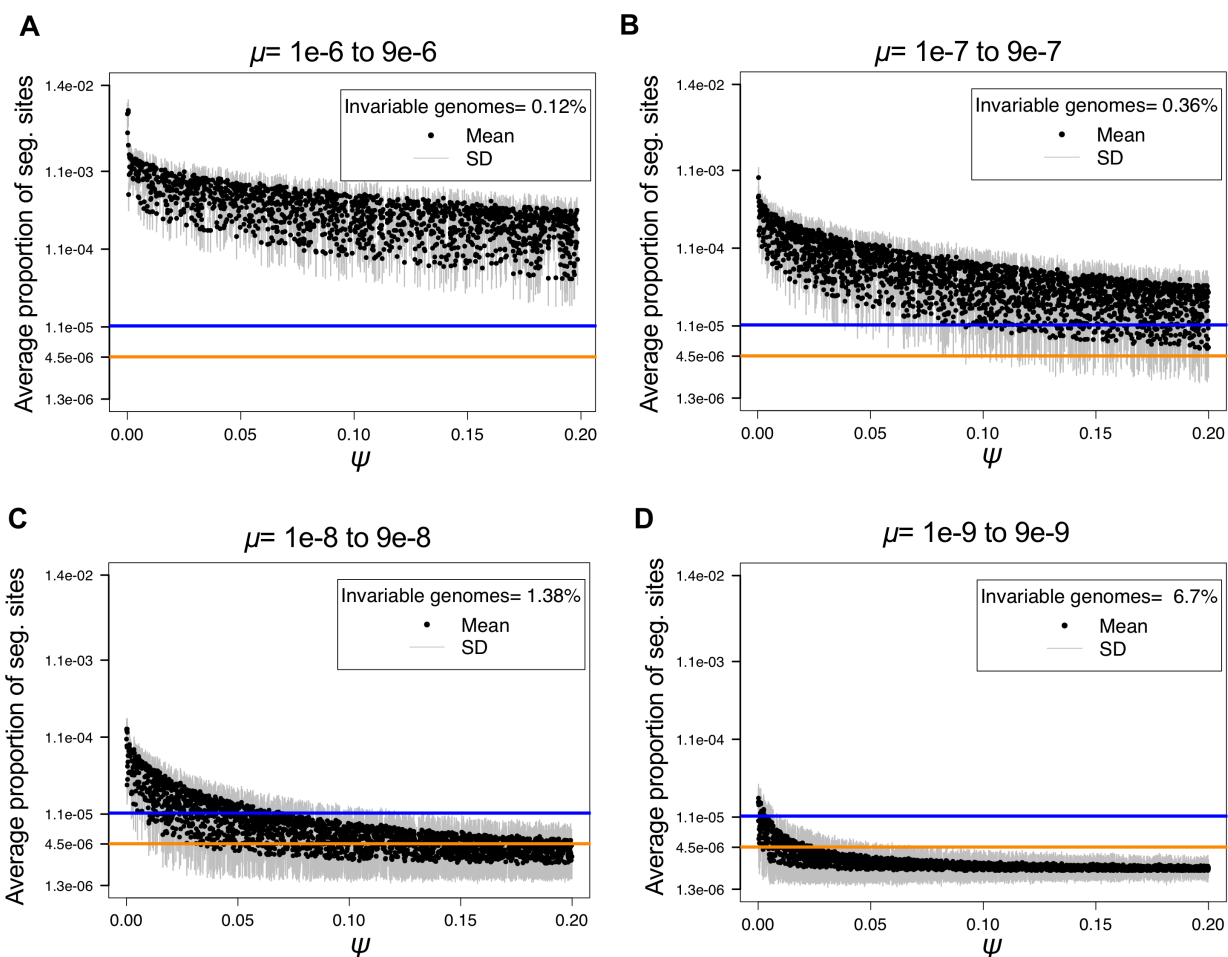

**Figure S1. Log scale distribution of segregating sites in unfiltered simulated populations as a function of mutation rate ( $\mu$ ) and progeny skew ( $\Psi$ ).** For each parameter combination of  $\mu$  and  $\Psi$  drawn from the prior (10,000 in total), 1,000 replicates were simulated, with the mean given by the black dot and the standard deviation given by the gray bars.  $\Psi$  proportions are given on the X-axis, while the proportion of segregating sites observed in the genome are given on the Y-axis. Each panel corresponds to a different order of magnitude of mutation rate: (A)  $1e-6$  to  $9e-6$ , (B)  $1e-7$  to  $9e-7$ , (C)  $1e-8$  to  $9e-8$ , and (D)  $1e-9$  to  $9e-9$ . The colored lines correspond to two examples of the proportion of segregating sites observed genome-wide in empirical patient data: 20 segregating sites as a mean (orange) and 50 segregating sites as the maximum observed from patient\_10 (blue) (Trauner *et al.* 2017).

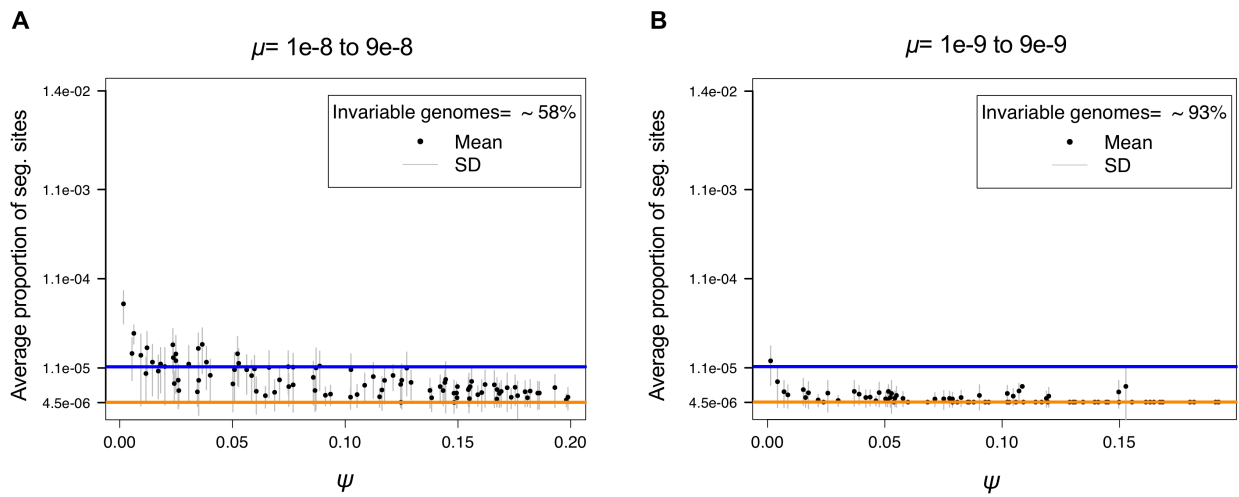

14

15 **Figure S2. Log scale distribution of segregating sites in filtered simulated populations of  $N$**

16 **= 25,000 as a function of mutation rate ( $\mu$ ) and progeny skew ( $\Psi$ ).** For each parameter

17 combination of  $\mu$  and  $\Psi$  drawn from the prior (100 in total), 100 replicates were simulated, with

18 the mean given by the black dot and the standard deviation given by the gray bars.  $\Psi$  proportions

19 are given on the X-axis, while the proportion of segregating sites observed in the genome are

20 given on the Y-axis. Each panel corresponds to a different order of magnitude of mutation rate:

21 (A)  $1e-8$  to  $9e-8$ , and (B)  $1e-9$  to  $9e-9$ . The colored lines correspond to two examples of the

22 proportion of segregating sites observed genome-wide in empirical patient data: 20 segregating

23 sites (orange) and 50 segregating sites (blue) (Trauner *et al.* 2017). As shown, inference remains

24 consistent with the results of Figure 2, even under this 25x larger population size.

25

26

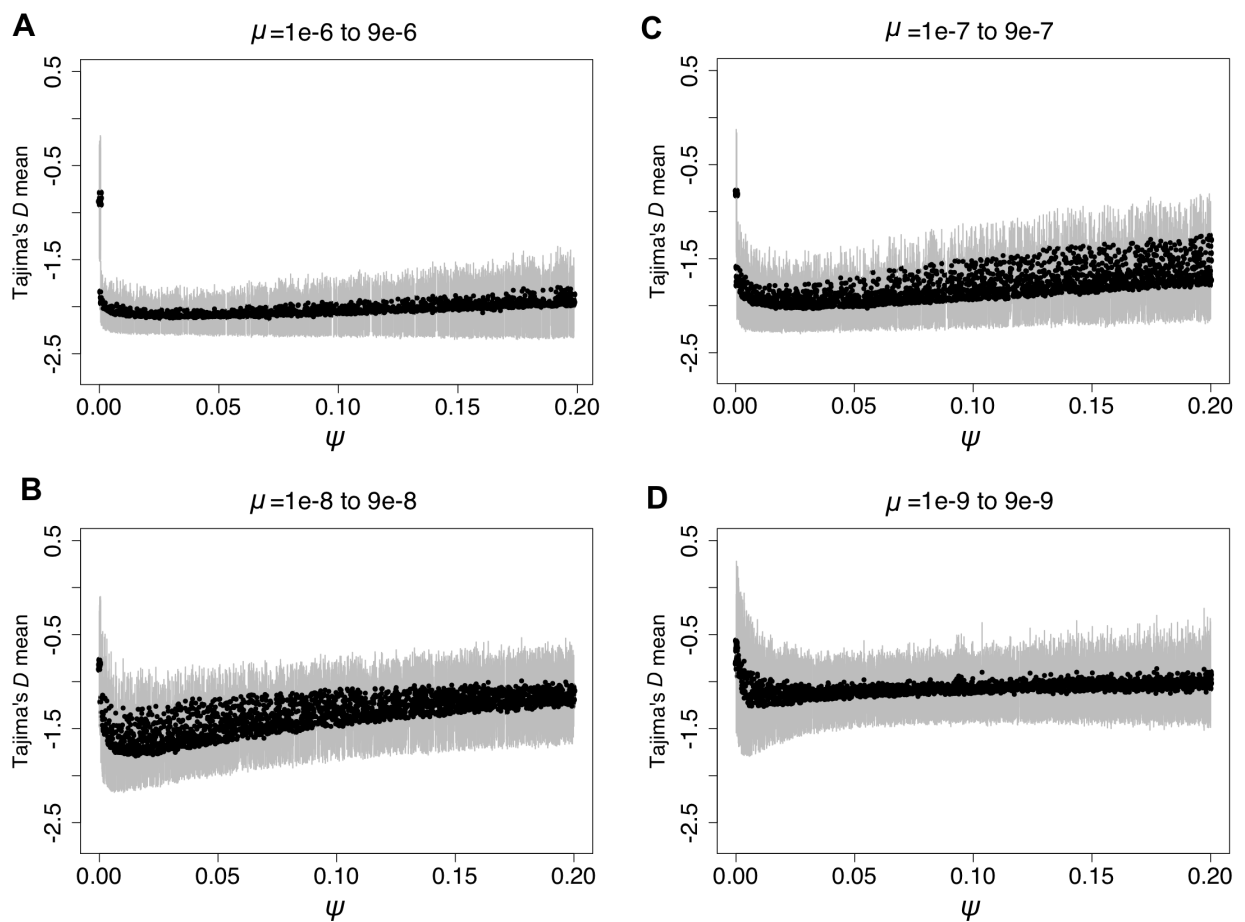

27

28 **Figure S3. The shape of the site frequency spectrum in unfiltered simulated populations, as**  
 29 **summarized by Tajima's  $D$ , as a function of mutation rate ( $\mu$ ) and progeny skew ( $\Psi$ ).** For  
 30 each parameter combination of  $\mu$  and  $\Psi$  drawn from the prior distributions (10,000 in total),  
 31 1,000 replicates were simulated, with the mean given by the black dot and the standard deviation  
 32 given by the gray bars.  $\Psi$  proportions are given on the X-axis, while the mean Tajima's  $D$  is  
 33 given on the Y-axis. Each panel corresponds to a different order of magnitude of mutation rate:  
 34 (A)  $1e-6$  to  $9e-6$ , (B)  $1e-7$  to  $9e-7$ , (C)  $1e-8$  to  $9e-8$ , and (D)  $1e-9$  to  $9e-9$ . As shown, the  
 35 distribution of variation expected to be observed in the genome differs as a function of these two  
 36 parameters - with a strong excess of rare mutations (negative  $D$ ) observed as the WF model is  
 37 initially violated at small values of  $\Psi$ , with a slight recovery towards 0 (and larger standard  
 38 deviations) observed as  $\Psi$  gets larger, owing to the rapidly decreasing number of segregating  
 39 sites associated with increased progeny skew.

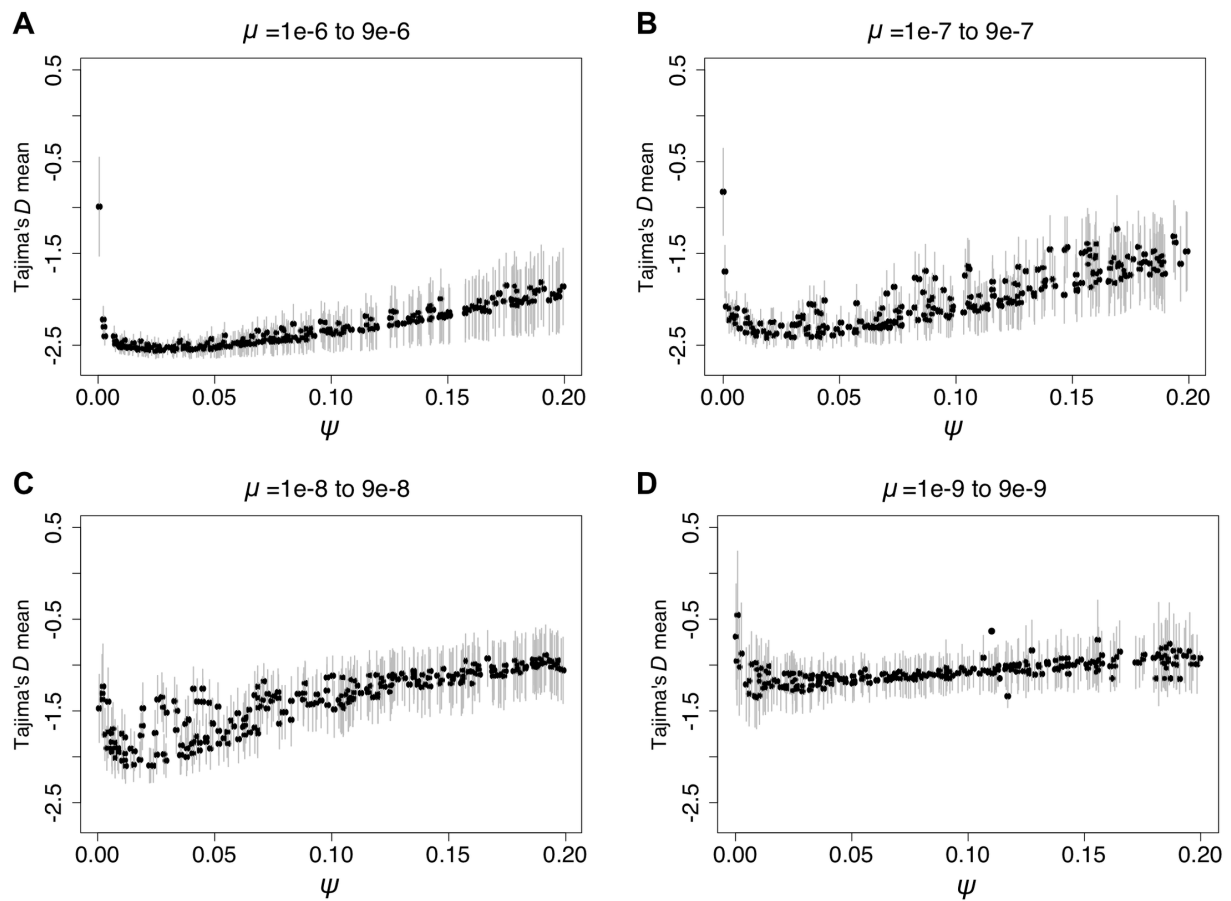

40

41 **Figure S4. The shape of the site frequency spectrum (SFS), as summarized by Tajima's  $D$ ,**

42 **in simulated populations after filtering out segregating sites under 2% frequency, as a**

43 **function of mutation rate ( $\mu$ ) and progeny skew ( $\Psi$ ).** 1,000 parameters combinations were

44 used. For each parameter combination of  $\mu$  and  $\Psi$  drawn from the prior distributions, 1,000

45 replicates were simulated, with the mean given by the black dot and the standard deviation given

46 by the gray bars.  $\Psi$  proportions are given on the X-axis, while the mean Tajima's  $D$  is given on

47 the Y-axis. Each panel corresponds to a different order of magnitude of mutation rate: (A)  $1e-6$

48 to  $9e-6$ , (B)  $1e-7$  to  $9e-7$ , (C)  $1e-8$  to  $9e-8$ , and (D)  $1e-9$  to  $9e-9$ . As shown, results remain largely

49 consistent pre- (Figure S3) and post-filtering.

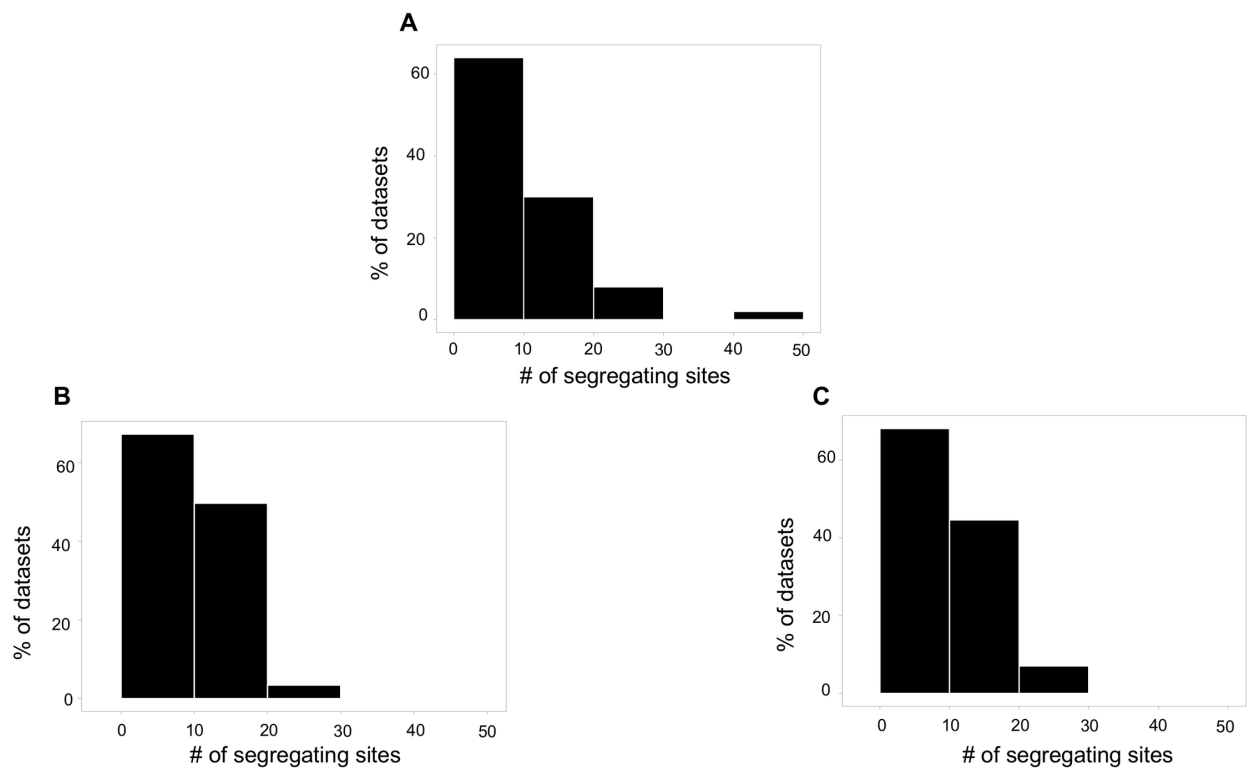

50

51 **Figure S5. The distribution of segregating sites in real versus simulated datasets.**

52 Comparison of the number of segregating sites observed from (A) patient samples (Trauner *et al.*  
 53 2017) , (B) simulated datasets with  $\mu = 3.1e-8$  and  $\Psi = 0.02$ , resulting in the same mean number  
 54 of segregating sites as observed in patients, and (C) simulated datasets with  $\mu = 3.7e-7$  and  $\Psi =$   
 55 0.18, also resulting in the same mean number of segregating sites as observed in patients. Thus,  
 56 these two point estimates essentially demarcate the boundaries on the joint posterior ridge  
 57 (Figure 3).

58

59

60

61

62

63

64

65

66

67

68

69

70

71

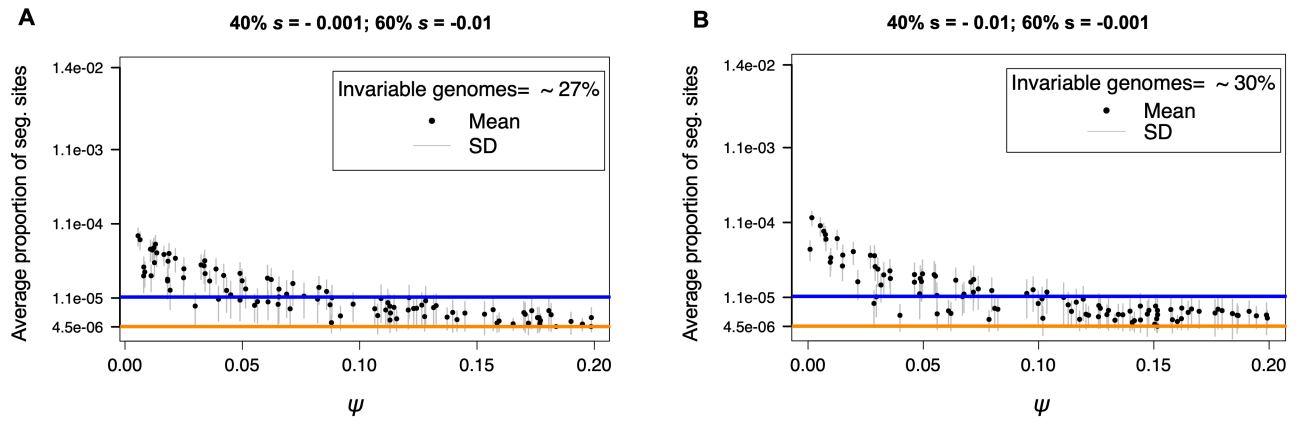

72

73 **Figure S6. Log scale distribution of segregating sites in filtered simulated populations of**  
74 **mutation rates ranging from 1e-8 to 9e-8, for two differing proportions of DFE density. For**  
75 **comparison with Figure 2c, (A) presents a DFE comprised of 40% effectively neutral and 60%**  
76 **deleterious mutations, and (B) presents a DFE comprised of 40% deleterious and 60% effectively**  
77 **neutral mutations. As shown, owing to the strong impact of progeny skew combined with the**  
78 **large-scale background selection effects inherent to this non-recombining genome, the same**  
79 **parameter range remains supported under these alternative DFEs.**

80

81

82

83

84

85

86

87

88

89 **Table S1. Simulation results.** Parameters simulated, ordered by descending mutation rate ( $\mu$ )  
90 and corresponding values of progeny skew ( $\Psi$ ) and bottleneck severity ( $N2$ ). Given are the mean  
91 and standard deviation of the summary statistics from 1000 replicates.

| Parameters              |                         |                | Summary statistics |                 |                        |                      |                      |
|-------------------------|-------------------------|----------------|--------------------|-----------------|------------------------|----------------------|----------------------|
| Mutation rate ( $\mu$ ) | Progeny skew ( $\psi$ ) | Bneck ( $N2$ ) | Tajima's $D$ mean  | Tajima's $D$ sd | Segregating sites mean | Segregating sites sd | % invariable genomes |
| 1.00E-06                | 0.08                    | 30             | -2.27              | 0.21            | 73.25                  | 27.92                | 0                    |
| 1.05E-06                | 0.05                    | 51             | -2.39              | 0.14            | 114.03                 | 38.30                | 0                    |
| 1.07E-06                | 0.07                    | 79             | -2.34              | 0.15            | 62.12                  | 22.01                | 0                    |
| 1.15E-06                | 0.17                    | 27             | -1.85              | 0.35            | 34.15                  | 14.59                | 0                    |
| 1.16E-06                | 0.08                    | 55             | -2.31              | 0.19            | 87.86                  | 32.73                | 0                    |
| 1.16E-06                | 0.15                    | 47             | -1.99              | 0.32            | 43.57                  | 18.33                | 0                    |
| 1.18E-06                | 0.10                    | 50             | -2.24              | 0.22            | 74.73                  | 27.22                | 0                    |
| 1.22E-06                | 0.00                    | 94             | -2.22              | 0.14            | 530.18                 | 111.42               | 0                    |
| 1.27E-06                | 0.04                    | 98             | -2.45              | 0.11            | 184.69                 | 55.99                | 0                    |
| 1.34E-06                | 0.07                    | 2              | -2.36              | 0.17            | 108.13                 | 36.60                | 0                    |
| 1.37E-06                | 0.19                    | 88             | -1.81              | 0.41            | 36.05                  | 15.12                | 0                    |
| 1.37E-06                | 0.18                    | 8              | -1.86              | 0.38            | 39.00                  | 16.43                | 0                    |
| 1.41E-06                | 0.02                    | 36             | -2.46              | 0.11            | 299.34                 | 81.76                | 0                    |
| 1.42E-06                | 0.05                    | 78             | -2.43              | 0.13            | 159.52                 | 54.08                | 0                    |
| 1.45E-06                | 0.13                    | 76             | -2.13              | 0.28            | 65.43                  | 24.44                | 0                    |
| 1.50E-06                | 0.03                    | 87             | -2.47              | 0.11            | 206.16                 | 63.09                | 0                    |
| 1.52E-06                | 0.14                    | 57             | -2.07              | 0.30            | 58.53                  | 21.69                | 0                    |
| 1.52E-06                | 0.13                    | 5              | -2.14              | 0.27            | 67.74                  | 25.94                | 0                    |
| 1.54E-06                | 0.10                    | 10             | -2.25              | 0.21            | 91.62                  | 33.44                | 0                    |
| 1.56E-06                | 0.13                    | 73             | -2.13              | 0.28            | 69.92                  | 27.12                | 0                    |
| 1.60E-06                | 0.00                    | 89             | -2.30              | 0.12            | 581.91                 | 125.90               | 0                    |
| 1.61E-06                | 0.11                    | 13             | -2.18              | 0.25            | 77.14                  | 29.58                | 0                    |
| 1.62E-06                | 0.19                    | 44             | -1.87              | 0.39            | 43.92                  | 18.62                | 0                    |
| 1.70E-06                | 0.08                    | 56             | -2.34              | 0.18            | 120.63                 | 42.28                | 0                    |
| 1.77E-06                | 0.18                    | 27             | -1.91              | 0.37            | 48.59                  | 21.04                | 0                    |
| 1.80E-06                | 0.01                    | 87             | -2.40              | 0.11            | 504.71                 | 117.25               | 0                    |
| 1.81E-06                | 0.07                    | 45             | -2.40              | 0.15            | 150.83                 | 51.46                | 0                    |
| 1.81E-06                | 0.17                    | 37             | -1.93              | 0.37            | 53.25                  | 20.52                | 0                    |
| 1.81E-06                | 0.09                    | 31             | -2.32              | 0.18            | 115.12                 | 41.23                | 0                    |
| 1.82E-06                | 0.01                    | 70             | -2.45              | 0.10            | 436.73                 | 103.75               | 0                    |
| 1.82E-06                | 0.17                    | 48             | -1.94              | 0.36            | 54.58                  | 21.79                | 0                    |
| 1.87E-06                | 0.10                    | 72             | -2.26              | 0.23            | 99.90                  | 36.87                | 0                    |
| 1.89E-06                | 0.07                    | 30             | -2.41              | 0.16            | 156.59                 | 51.49                | 0                    |
| 1.91E-06                | 0.08                    | 53             | -2.37              | 0.18            | 140.44                 | 50.62                | 0                    |
| 1.92E-06                | 0.09                    | 14             | -2.32              | 0.21            | 119.20                 | 41.99                | 0                    |
| 1.98E-06                | 0.07                    | 25             | -2.39              | 0.16            | 153.30                 | 52.89                | 0                    |
| 2.05E-06                | 0.06                    | 89             | -2.43              | 0.14            | 173.69                 | 56.74                | 0                    |
| 2.10E-06                | 0.04                    | 42             | -2.49              | 0.11            | 247.24                 | 74.12                | 0                    |
| 2.11E-06                | 0.17                    | 57             | -1.98              | 0.33            | 48.27                  | 17.98                | 30.6                 |
| 2.13E-06                | 0.12                    | 77             | -2.22              | 0.25            | 100.63                 | 38.00                | 0                    |
| 2.15E-06                | 0.14                    | 51             | -2.11              | 0.27            | 58.14                  | 22.20                | 0                    |
| 2.18E-06                | 0.16                    | 18             | -2.02              | 0.34            | 69.00                  | 27.61                | 0                    |
| 2.20E-06                | 0.02                    | 8              | -2.48              | 0.09            | 427.76                 | 106.33               | 0                    |
| 2.20E-06                | 0.02                    | 82             | -2.49              | 0.10            | 365.72                 | 102.03               | 0                    |
| 2.21E-06                | 0.19                    | 28             | -1.90              | 0.40            | 57.49                  | 23.35                | 0                    |

|          |      |    |       |      |        |        |      |
|----------|------|----|-------|------|--------|--------|------|
| 2.22E-06 | 0.09 | 42 | -2.34 | 0.19 | 139.26 | 49.72  | 0    |
| 2.24E-06 | 0.19 | 45 | -1.91 | 0.36 | 44.85  | 17.11  | 0    |
| 2.28E-06 | 0.13 | 5  | -2.20 | 0.24 | 98.00  | 36.41  | 0    |
| 2.28E-06 | 0.14 | 32 | -2.15 | 0.28 | 87.13  | 33.44  | 0    |
| 2.35E-06 | 0.05 | 44 | -2.48 | 0.12 | 236.37 | 73.31  | 0    |
| 2.52E-06 | 0.19 | 83 | -1.89 | 0.41 | 63.42  | 26.09  | 0    |
| 2.61E-06 | 0.02 | 67 | -2.50 | 0.09 | 385.13 | 108.51 | 0    |
| 2.66E-06 | 0.14 | 59 | -2.11 | 0.31 | 96.28  | 36.99  | 0    |
| 2.71E-06 | 0.20 | 66 | -1.86 | 0.42 | 64.02  | 25.96  | 0    |
| 2.73E-06 | 0.03 | 80 | -2.51 | 0.09 | 376.28 | 107.57 | 0    |
| 2.87E-06 | 0.03 | 3  | -2.52 | 0.08 | 166.65 | 52.69  | 0    |
| 2.87E-06 | 0.14 | 34 | -2.13 | 0.30 | 104.75 | 38.78  | 0    |
| 2.93E-06 | 0.05 | 47 | -2.47 | 0.13 | 251.39 | 82.08  | 0    |
| 2.94E-06 | 0.10 | 12 | -2.34 | 0.18 | 157.71 | 54.81  | 0    |
| 3.01E-06 | 0.08 | 52 | -2.39 | 0.17 | 187.60 | 66.33  | 0    |
| 3.02E-06 | 0.13 | 3  | -2.18 | 0.28 | 114.74 | 40.91  | 0    |
| 3.02E-06 | 0.04 | 31 | -2.51 | 0.10 | 325.83 | 102.62 | 0    |
| 3.03E-06 | 0.10 | 97 | -2.32 | 0.21 | 160.46 | 57.38  | 0    |
| 3.05E-06 | 0.18 | 20 | -2.00 | 0.35 | 82.89  | 33.44  | 0    |
| 3.09E-06 | 0.17 | 47 | -2.04 | 0.32 | 64.38  | 25.71  | 52.6 |
| 3.11E-06 | 0.07 | 68 | -2.42 | 0.16 | 208.45 | 73.55  | 0    |
| 3.15E-06 | 0.11 | 97 | -2.30 | 0.22 | 150.87 | 55.35  | 0    |
| 3.16E-06 | 0.06 | 50 | -2.47 | 0.13 | 246.51 | 82.19  | 0    |
| 3.19E-06 | 0.19 | 95 | -1.93 | 0.40 | 80.04  | 32.79  | 0    |
| 3.20E-06 | 0.16 | 67 | -2.08 | 0.32 | 98.94  | 36.62  | 0    |
| 3.21E-06 | 0.20 | 97 | -1.90 | 0.41 | 73.48  | 30.10  | 0    |
| 3.24E-06 | 0.10 | 82 | -2.33 | 0.20 | 171.88 | 60.99  | 0    |
| 3.24E-06 | 0.03 | 5  | -2.51 | 0.10 | 371.41 | 114.00 | 0    |
| 3.24E-06 | 0.11 | 45 | -2.30 | 0.23 | 155.65 | 57.23  | 0    |
| 3.25E-06 | 0.01 | 81 | -2.47 | 0.09 | 615.46 | 144.49 | 0    |
| 3.34E-06 | 0.09 | 69 | -2.36 | 0.18 | 188.15 | 66.35  | 0    |
| 3.38E-06 | 0.08 | 10 | -2.42 | 0.16 | 223.29 | 76.95  | 0    |
| 3.38E-06 | 0.18 | 17 | -1.99 | 0.32 | 62.81  | 24.34  | 56.8 |
| 3.44E-06 | 0.05 | 29 | -2.50 | 0.11 | 143.29 | 48.38  | 60.2 |
| 3.51E-06 | 0.09 | 30 | -2.36 | 0.19 | 191.03 | 66.20  | 0    |
| 3.63E-06 | 0.17 | 62 | -2.02 | 0.38 | 98.79  | 38.19  | 0    |
| 3.64E-06 | 0.02 | 17 | -2.52 | 0.09 | 491.72 | 134.79 | 0    |
| 3.72E-06 | 0.01 | 35 | -2.46 | 0.09 | 751.52 | 171.61 | 0    |
| 3.73E-06 | 0.07 | 16 | -2.44 | 0.14 | 246.58 | 84.59  | 0    |
| 3.76E-06 | 0.13 | 45 | -2.21 | 0.26 | 139.56 | 51.31  | 0    |
| 3.77E-06 | 0.02 | 52 | -2.53 | 0.08 | 479.20 | 133.02 | 0    |
| 3.78E-06 | 0.06 | 18 | -2.48 | 0.13 | 283.14 | 92.52  | 0    |
| 3.81E-06 | 0.06 | 31 | -2.46 | 0.13 | 271.95 | 91.58  | 0    |
| 3.81E-06 | 0.04 | 47 | -2.50 | 0.11 | 345.88 | 108.22 | 0    |
| 3.85E-06 | 0.05 | 89 | -2.51 | 0.10 | 162.16 | 51.37  | 0    |
| 3.89E-06 | 0.16 | 50 | -2.10 | 0.32 | 117.26 | 45.18  | 0    |
| 3.92E-06 | 0.11 | 66 | -2.33 | 0.22 | 183.75 | 65.43  | 0    |
| 3.93E-06 | 0.10 | 22 | -2.35 | 0.20 | 197.81 | 70.32  | 0    |
| 4.06E-06 | 0.08 | 27 | -2.40 | 0.17 | 231.15 | 77.99  | 0    |
| 4.07E-06 | 0.05 | 99 | -2.50 | 0.11 | 320.98 | 100.88 | 0    |
| 4.09E-06 | 0.16 | 39 | -2.08 | 0.34 | 119.81 | 46.43  | 0    |
| 4.11E-06 | 0.15 | 97 | -2.16 | 0.29 | 136.81 | 51.00  | 0    |



|          |      |    |       |      |        |        |      |
|----------|------|----|-------|------|--------|--------|------|
| 4.13E-06 | 0.07 | 91 | -2.45 | 0.14 | 261.73 | 88.21  | 0    |
| 4.13E-06 | 0.18 | 72 | -2.01 | 0.38 | 104.37 | 41.08  | 0    |
| 4.14E-06 | 0.18 | 25 | -1.98 | 0.39 | 105.10 | 42.01  | 0    |
| 4.19E-06 | 0.12 | 91 | -2.28 | 0.23 | 177.23 | 61.32  | 0    |
| 4.22E-06 | 0.06 | 74 | -2.47 | 0.13 | 283.84 | 93.60  | 0    |
| 4.23E-06 | 0.04 | 24 | -2.51 | 0.11 | 365.05 | 116.15 | 0    |
| 4.27E-06 | 0.06 | 61 | -2.47 | 0.14 | 292.16 | 96.34  | 0    |
| 4.27E-06 | 0.06 | 56 | -2.48 | 0.13 | 310.77 | 98.59  | 0    |
| 4.27E-06 | 0.05 | 70 | -2.50 | 0.12 | 341.95 | 109.99 | 0    |
| 4.28E-06 | 0.08 | 85 | -2.41 | 0.17 | 245.99 | 82.80  | 0    |
| 4.33E-06 | 0.18 | 16 | -2.00 | 0.35 | 73.08  | 28.78  | 0    |
| 4.34E-06 | 0.09 | 85 | -2.39 | 0.16 | 126.78 | 44.33  | 0    |
| 4.35E-06 | 0.03 | 16 | -2.53 | 0.09 | 441.81 | 130.87 | 0    |
| 4.39E-06 | 0.17 | 1  | -2.04 | 0.36 | 121.47 | 47.98  | 0    |
| 4.40E-06 | 0.18 | 97 | -2.02 | 0.34 | 112.82 | 44.80  | 0    |
| 4.44E-06 | 0.01 | 39 | -2.49 | 0.09 | 763.84 | 181.69 | 0    |
| 4.46E-06 | 0.06 | 45 | -2.48 | 0.11 | 152.56 | 51.75  | 68.1 |
| 4.66E-06 | 0.16 | 2  | -2.10 | 0.32 | 88.53  | 32.16  | 0    |
| 4.68E-06 | 0.15 | 36 | -2.17 | 0.30 | 148.64 | 55.85  | 0    |
| 4.69E-06 | 0.16 | 5  | -2.12 | 0.32 | 135.54 | 51.72  | 0    |
| 4.69E-06 | 0.18 | 68 | -2.01 | 0.38 | 119.29 | 47.69  | 0    |
| 4.77E-06 | 0.14 | 66 | -2.20 | 0.28 | 163.71 | 60.01  | 0    |
| 4.83E-06 | 0.10 | 54 | -2.36 | 0.20 | 226.20 | 78.89  | 0    |
| 4.90E-06 | 0.07 | 36 | -2.46 | 0.14 | 309.92 | 98.60  | 0    |
| 4.93E-06 | 0.04 | 45 | -2.53 | 0.09 | 437.73 | 134.20 | 0    |
| 4.96E-06 | 0.19 | 66 | -1.94 | 0.41 | 111.01 | 45.52  | 0    |
| 5.00E-06 | 0.08 | 81 | -2.42 | 0.16 | 271.63 | 90.25  | 0    |
| 5.04E-06 | 0.01 | 41 | -2.50 | 0.08 | 765.12 | 187.52 | 0    |
| 5.08E-06 | 0.09 | 67 | -2.40 | 0.17 | 137.78 | 50.38  | 0    |
| 5.19E-06 | 0.08 | 51 | -2.42 | 0.16 | 279.02 | 94.16  | 0    |
| 5.19E-06 | 0.18 | 13 | -2.01 | 0.37 | 131.71 | 50.46  | 0    |
| 5.29E-06 | 0.16 | 5  | -2.11 | 0.31 | 151.00 | 57.19  | 0    |
| 5.34E-06 | 0.04 | 70 | -2.54 | 0.09 | 466.30 | 140.97 | 0    |
| 5.35E-06 | 0.03 | 79 | -2.54 | 0.09 | 502.51 | 146.17 | 0    |
| 5.35E-06 | 0.07 | 73 | -2.45 | 0.14 | 307.53 | 98.73  | 0    |
| 5.37E-06 | 0.07 | 98 | -2.46 | 0.14 | 318.07 | 106.42 | 0    |
| 5.39E-06 | 0.15 | 61 | -2.17 | 0.29 | 164.10 | 58.77  | 0    |
| 5.43E-06 | 0.03 | 76 | -2.54 | 0.09 | 490.96 | 145.83 | 0    |
| 5.46E-06 | 0.15 | 94 | -2.14 | 0.30 | 163.69 | 61.69  | 0    |
| 5.50E-06 | 0.01 | 73 | -2.51 | 0.08 | 745.90 | 194.38 | 0    |
| 5.51E-06 | 0.15 | 41 | -2.18 | 0.28 | 171.60 | 64.52  | 0    |
| 5.52E-06 | 0.02 | 8  | -2.53 | 0.09 | 680.68 | 183.99 | 0    |
| 5.60E-06 | 0.08 | 68 | -2.42 | 0.16 | 302.27 | 106.08 | 0    |
| 5.61E-06 | 0.04 | 66 | -2.53 | 0.10 | 457.64 | 145.37 | 0    |
| 5.63E-06 | 0.13 | 5  | -2.23 | 0.25 | 187.17 | 68.44  | 0    |
| 5.64E-06 | 0.17 | 49 | -2.09 | 0.34 | 154.34 | 57.48  | 0    |
| 5.64E-06 | 0.20 | 52 | -1.95 | 0.41 | 120.54 | 47.31  | 0    |
| 5.67E-06 | 0.01 | 37 | -2.53 | 0.08 | 731.89 | 186.88 | 0    |
| 5.77E-06 | 0.04 | 20 | -2.53 | 0.10 | 475.95 | 151.07 | 11.6 |
| 5.80E-06 | 0.10 | 31 | -2.35 | 0.22 | 252.06 | 87.42  | 0    |
| 5.82E-06 | 0.02 | 41 | -2.54 | 0.08 | 670.96 | 187.64 | 0    |
| 5.87E-06 | 0.12 | 42 | -2.29 | 0.25 | 224.90 | 80.55  | 0    |

|          |      |    |       |      |         |         |      |
|----------|------|----|-------|------|---------|---------|------|
| 5.88E-06 | 0.01 | 12 | -2.53 | 0.07 | 354.52  | 90.49   | 0    |
| 5.92E-06 | 0.11 | 8  | -2.33 | 0.22 | 245.33  | 89.74   | 0    |
| 5.95E-06 | 0.16 | 88 | -2.09 | 0.34 | 159.67  | 63.38   | 0    |
| 5.96E-06 | 0.09 | 18 | -2.42 | 0.16 | 153.28  | 55.05   | 0    |
| 6.00E-06 | 0.18 | 30 | -2.04 | 0.36 | 144.43  | 55.87   | 0    |
| 6.02E-06 | 0.18 | 55 | -2.06 | 0.33 | 147.44  | 57.72   | 0    |
| 6.05E-06 | 0.00 | 32 | -2.40 | 0.10 | 1198.87 | 255.71  | 0    |
| 6.08E-06 | 0.02 | 1  | -2.54 | 0.08 | 681.49  | 179.41  | 0    |
| 6.14E-06 | 0.06 | 55 | -2.49 | 0.13 | 383.21  | 129.85  | 0    |
| 6.22E-06 | 0.04 | 2  | -2.53 | 0.10 | 474.70  | 147.92  | 0    |
| 6.22E-06 | 0.05 | 68 | -2.52 | 0.11 | 422.11  | 136.96  | 0    |
| 6.28E-06 | 0.05 | 58 | -2.53 | 0.10 | 449.10  | 145.23  | 0    |
| 6.29E-06 | 0.08 | 44 | -2.43 | 0.16 | 321.52  | 106.13  | 0    |
| 6.33E-06 | 0.19 | 51 | -2.01 | 0.38 | 138.23  | 54.61   | 0    |
| 6.34E-06 | 0.03 | 71 | -2.55 | 0.08 | 581.88  | 172.53  | 0    |
| 6.35E-06 | 0.09 | 32 | -2.40 | 0.18 | 295.07  | 100.32  | 0    |
| 6.37E-06 | 0.14 | 50 | -2.20 | 0.27 | 120.96  | 46.29   | 0    |
| 6.39E-06 | 0.00 | 97 | -0.99 | 0.54 | 4711.72 | 1154.14 | 0    |
| 6.43E-06 | 0.05 | 75 | -2.52 | 0.11 | 442.70  | 142.79  | 0    |
| 6.43E-06 | 0.06 | 7  | -2.49 | 0.13 | 390.06  | 130.05  | 0    |
| 6.46E-06 | 0.04 | 19 | -2.54 | 0.09 | 511.88  | 159.56  | 0    |
| 6.51E-06 | 0.06 | 79 | -2.49 | 0.12 | 389.01  | 123.46  | 0    |
| 6.52E-06 | 0.18 | 95 | -2.05 | 0.35 | 158.22  | 61.29   | 0    |
| 6.62E-06 | 0.01 | 49 | -2.53 | 0.08 | 840.51  | 207.17  | 0    |
| 6.68E-06 | 0.03 | 41 | -2.55 | 0.08 | 643.11  | 184.41  | 0    |
| 6.71E-06 | 0.18 | 81 | -2.03 | 0.36 | 157.08  | 59.45   | 0    |
| 6.74E-06 | 0.01 | 72 | -2.53 | 0.08 | 870.14  | 224.09  | 0    |
| 6.78E-06 | 0.04 | 80 | -2.54 | 0.09 | 497.06  | 147.93  | 0    |
| 6.78E-06 | 0.18 | 47 | -2.04 | 0.35 | 163.30  | 62.91   | 0    |
| 6.81E-06 | 0.15 | 21 | -2.19 | 0.28 | 122.69  | 45.58   | 0    |
| 6.83E-06 | 0.06 | 59 | -2.51 | 0.11 | 422.41  | 134.05  | 0    |
| 6.84E-06 | 0.08 | 49 | -2.44 | 0.16 | 350.26  | 118.35  | 0    |
| 6.84E-06 | 0.03 | 15 | -2.56 | 0.08 | 644.69  | 193.02  | 0    |
| 6.87E-06 | 0.09 | 47 | -2.42 | 0.18 | 320.62  | 104.46  | 0    |
| 6.91E-06 | 0.01 | 75 | -2.49 | 0.08 | 1048.33 | 239.36  | 0    |
| 6.95E-06 | 0.19 | 78 | -2.02 | 0.35 | 157.65  | 60.19   | 0    |
| 6.98E-06 | 0.15 | 8  | -2.17 | 0.30 | 201.86  | 76.86   | 0    |
| 7.01E-06 | 0.12 | 99 | -2.32 | 0.22 | 260.33  | 92.97   | 0    |
| 7.02E-06 | 0.06 | 68 | -2.50 | 0.13 | 408.59  | 129.63  | 0    |
| 7.04E-06 | 0.08 | 49 | -2.46 | 0.14 | 369.08  | 124.33  | 0    |
| 7.04E-06 | 0.02 | 27 | -2.55 | 0.07 | 739.16  | 201.87  | 0    |
| 7.08E-06 | 0.10 | 11 | -2.37 | 0.20 | 298.49  | 106.80  | 0    |
| 7.17E-06 | 0.16 | 34 | -2.11 | 0.32 | 189.62  | 73.83   | 0    |
| 7.17E-06 | 0.18 | 30 | -2.06 | 0.33 | 112.16  | 39.13   | 80.6 |
| 7.18E-06 | 0.14 | 21 | -2.23 | 0.27 | 230.21  | 79.97   | 0    |
| 7.19E-06 | 0.05 | 58 | -2.53 | 0.11 | 474.91  | 150.53  | 0    |
| 7.21E-06 | 0.13 | 41 | -2.26 | 0.24 | 238.43  | 84.13   | 0    |
| 7.22E-06 | 0.15 | 89 | -2.18 | 0.30 | 210.57  | 80.26   | 0    |
| 7.22E-06 | 0.07 | 27 | -2.49 | 0.14 | 395.22  | 131.00  | 0    |
| 7.29E-06 | 0.05 | 28 | -2.51 | 0.12 | 447.44  | 148.29  | 0    |
| 7.35E-06 | 0.05 | 34 | -2.53 | 0.11 | 494.59  | 158.04  | 0    |
| 7.37E-06 | 0.05 | 95 | -2.52 | 0.11 | 472.23  | 147.74  | 0    |

|          |      |    |       |      |         |        |      |
|----------|------|----|-------|------|---------|--------|------|
| 7.39E-06 | 0.05 | 44 | -2.54 | 0.09 | 222.21  | 75.67  | 0    |
| 7.39E-06 | 0.14 | 65 | -2.22 | 0.27 | 228.38  | 82.60  | 0    |
| 7.41E-06 | 0.08 | 26 | -2.45 | 0.16 | 350.58  | 127.48 | 0    |
| 7.42E-06 | 0.14 | 4  | -2.23 | 0.28 | 232.20  | 84.06  | 0    |
| 7.50E-06 | 0.07 | 53 | -2.47 | 0.14 | 380.47  | 126.84 | 0.5  |
| 7.52E-06 | 0.14 | 72 | -2.25 | 0.26 | 236.18  | 86.08  | 0    |
| 7.60E-06 | 0.04 | 92 | -2.55 | 0.09 | 549.20  | 174.91 | 0    |
| 7.60E-06 | 0.20 | 56 | -1.97 | 0.39 | 160.59  | 61.63  | 0    |
| 7.64E-06 | 0.08 | 79 | -2.46 | 0.16 | 386.46  | 132.39 | 0    |
| 7.69E-06 | 0.09 | 71 | -2.45 | 0.14 | 179.42  | 63.82  | 0    |
| 7.73E-06 | 0.08 | 79 | -2.45 | 0.15 | 376.58  | 127.84 | 0    |
| 7.77E-06 | 0.20 | 63 | -1.98 | 0.39 | 164.70  | 63.21  | 0    |
| 7.80E-06 | 0.01 | 63 | -2.52 | 0.08 | 966.52  | 235.75 | 0    |
| 7.87E-06 | 0.18 | 71 | -2.07 | 0.34 | 181.52  | 69.42  | 0    |
| 7.88E-06 | 0.08 | 35 | -2.45 | 0.15 | 383.83  | 133.02 | 0    |
| 7.89E-06 | 0.17 | 59 | -2.12 | 0.32 | 201.40  | 75.09  | 0    |
| 7.92E-06 | 0.07 | 93 | -2.49 | 0.13 | 418.80  | 138.74 | 0    |
| 7.98E-06 | 0.06 | 13 | -2.51 | 0.12 | 451.14  | 146.23 | 1.1  |
| 7.99E-06 | 0.09 | 53 | -2.44 | 0.15 | 179.84  | 65.68  | 0    |
| 7.99E-06 | 0.05 | 97 | -2.53 | 0.11 | 495.40  | 155.93 | 0    |
| 8.00E-06 | 0.05 | 89 | -2.53 | 0.10 | 497.63  | 154.43 | 0    |
| 8.00E-06 | 0.13 | 83 | -2.28 | 0.25 | 268.95  | 96.31  | 0    |
| 8.00E-06 | 0.12 | 55 | -2.32 | 0.23 | 288.98  | 97.70  | 0    |
| 8.01E-06 | 0.15 | 87 | -2.20 | 0.28 | 136.62  | 48.86  | 0    |
| 8.12E-06 | 0.17 | 87 | -2.13 | 0.32 | 124.24  | 46.65  | 0    |
| 8.13E-06 | 0.02 | 75 | -2.55 | 0.08 | 773.33  | 207.64 | 0    |
| 8.17E-06 | 0.13 | 80 | -2.28 | 0.24 | 276.99  | 96.62  | 10.1 |
| 8.27E-06 | 0.07 | 45 | -2.46 | 0.15 | 413.27  | 143.77 | 0    |
| 8.30E-06 | 0.02 | 88 | -2.57 | 0.08 | 719.67  | 211.75 | 0    |
| 8.31E-06 | 0.10 | 65 | -2.36 | 0.20 | 321.74  | 112.56 | 0    |
| 8.44E-06 | 0.19 | 80 | -2.02 | 0.38 | 188.77  | 72.47  | 0    |
| 8.46E-06 | 0.10 | 5  | -2.38 | 0.20 | 335.76  | 113.24 | 0    |
| 8.47E-06 | 0.17 | 75 | -2.13 | 0.32 | 216.68  | 83.37  | 0    |
| 8.47E-06 | 0.03 | 37 | -2.56 | 0.08 | 653.55  | 201.75 | 0    |
| 8.49E-06 | 0.05 | 70 | -2.53 | 0.11 | 511.33  | 168.06 | 0    |
| 8.50E-06 | 0.01 | 93 | -2.52 | 0.08 | 996.00  | 253.67 | 0    |
| 8.50E-06 | 0.16 | 58 | -2.15 | 0.31 | 224.71  | 82.46  | 0    |
| 8.59E-06 | 0.12 | 2  | -2.31 | 0.23 | 301.44  | 110.81 | 0    |
| 8.64E-06 | 0.11 | 34 | -2.33 | 0.23 | 313.45  | 111.52 | 0    |
| 8.64E-06 | 0.13 | 19 | -2.26 | 0.26 | 281.85  | 100.78 | 0    |
| 8.73E-06 | 0.13 | 41 | -2.25 | 0.28 | 270.21  | 100.76 | 0    |
| 8.73E-06 | 0.02 | 22 | -2.55 | 0.08 | 785.93  | 223.02 | 0    |
| 8.74E-06 | 0.02 | 80 | -2.55 | 0.08 | 864.54  | 242.73 | 0    |
| 8.78E-06 | 0.12 | 1  | -2.32 | 0.24 | 310.70  | 109.17 | 0    |
| 8.79E-06 | 0.10 | 78 | -2.38 | 0.19 | 335.42  | 119.68 | 0    |
| 8.81E-06 | 0.01 | 97 | -2.52 | 0.08 | 1085.27 | 272.37 | 0    |
| 8.81E-06 | 0.04 | 79 | -2.56 | 0.09 | 612.42  | 203.42 | 0    |
| 8.84E-06 | 0.11 | 88 | -2.34 | 0.21 | 319.74  | 108.26 | 0    |
| 8.89E-06 | 0.05 | 8  | -2.54 | 0.10 | 560.69  | 173.71 | 3.9  |
| 1.01E-07 | 0.04 | 42 | -2.05 | 0.20 | 21.65   | 8.30   | 0    |
| 1.07E-07 | 0.04 | 60 | -2.01 | 0.21 | 19.40   | 7.61   | 0.1  |
| 1.11E-07 | 0.04 | 4  | -2.06 | 0.20 | 22.62   | 8.50   | 0    |

|          |      |    |       |      |        |       |      |
|----------|------|----|-------|------|--------|-------|------|
| 1.16E-07 | 0.09 | 96 | -1.69 | 0.29 | 9.42   | 4.34  | 1.6  |
| 1.31E-07 | 0.08 | 26 | -1.77 | 0.28 | 11.30  | 5.27  | 0.5  |
| 1.32E-07 | 0.17 | 32 | -1.24 | 0.37 | 4.79   | 2.41  | 11.7 |
| 1.32E-07 | 0.07 | 70 | -1.87 | 0.25 | 13.38  | 5.78  | 0.4  |
| 1.32E-07 | 0.01 | 77 | -2.13 | 0.19 | 76.43  | 19.25 | 0    |
| 1.35E-07 | 0.00 | 77 | -1.70 | 0.28 | 136.12 | 30.23 | 0    |
| 1.39E-07 | 0.08 | 44 | -1.78 | 0.27 | 11.88  | 5.49  | 0.5  |
| 1.43E-07 | 0.11 | 85 | -1.64 | 0.30 | 9.36   | 4.62  | 1    |
| 1.46E-07 | 0.04 | 17 | -2.14 | 0.18 | 28.42  | 10.39 | 0    |
| 1.48E-07 | 0.01 | 78 | -2.10 | 0.18 | 98.16  | 24.08 | 0    |
| 1.51E-07 | 0.11 | 79 | -1.67 | 0.31 | 9.77   | 4.55  | 1.6  |
| 1.54E-07 | 0.03 | 71 | -2.18 | 0.17 | 34.49  | 11.81 | 0    |
| 1.55E-07 | 0.03 | 97 | -2.19 | 0.17 | 37.51  | 12.53 | 0    |
| 1.57E-07 | 0.06 | 13 | -2.04 | 0.20 | 20.97  | 8.10  | 0    |
| 1.59E-07 | 0.09 | 65 | -1.77 | 0.28 | 12.21  | 5.73  | 0.6  |
| 1.59E-07 | 0.14 | 9  | -1.46 | 0.37 | 7.03   | 3.52  | 3.2  |
| 1.61E-07 | 0.07 | 69 | -1.94 | 0.25 | 17.01  | 7.29  | 0.2  |
| 1.62E-07 | 0.15 | 83 | -1.43 | 0.33 | 6.72   | 3.29  | 3.8  |
| 1.65E-07 | 0.03 | 59 | -2.20 | 0.16 | 37.41  | 12.51 | 0    |
| 1.65E-07 | 0.04 | 29 | -2.15 | 0.19 | 30.24  | 10.84 | 0    |
| 1.67E-07 | 0.04 | 83 | -2.16 | 0.17 | 30.33  | 11.01 | 0    |
| 1.72E-07 | 0.16 | 69 | -1.40 | 0.35 | 6.41   | 3.22  | 7.8  |
| 1.75E-07 | 0.10 | 12 | -1.74 | 0.29 | 11.68  | 5.48  | 0.9  |
| 1.82E-07 | 0.15 | 88 | -1.46 | 0.36 | 7.62   | 3.76  | 3.5  |
| 1.83E-07 | 0.02 | 23 | -2.25 | 0.15 | 60.75  | 17.80 | 0    |
| 1.89E-07 | 0.16 | 48 | -1.39 | 0.38 | 7.01   | 3.69  | 4.2  |
| 1.90E-07 | 0.02 | 89 | -2.25 | 0.16 | 59.16  | 17.48 | 0    |
| 1.92E-07 | 0.01 | 30 | -2.20 | 0.17 | 97.79  | 24.93 | 0    |
| 1.94E-07 | 0.02 | 51 | -2.25 | 0.16 | 63.04  | 18.30 | 0    |
| 2.03E-07 | 0.16 | 34 | -1.46 | 0.38 | 7.92   | 4.09  | 4.1  |
| 2.19E-07 | 0.09 | 74 | -1.92 | 0.26 | 17.61  | 7.36  | 0.1  |
| 2.19E-07 | 0.03 | 27 | -2.26 | 0.15 | 49.27  | 15.76 | 0    |
| 2.20E-07 | 0.15 | 77 | -1.50 | 0.37 | 8.62   | 4.15  | 2.4  |
| 2.22E-07 | 0.13 | 43 | -1.65 | 0.32 | 10.79  | 5.21  | 1.2  |
| 2.25E-07 | 0.16 | 48 | -1.48 | 0.37 | 8.40   | 4.35  | 2.2  |
| 2.30E-07 | 0.03 | 71 | -2.27 | 0.14 | 55.34  | 18.13 | 0    |
| 2.31E-07 | 0.02 | 84 | -2.26 | 0.15 | 84.82  | 22.91 | 0    |
| 2.43E-07 | 0.09 | 40 | -1.90 | 0.27 | 17.18  | 7.41  | 0.2  |
| 2.45E-07 | 0.02 | 43 | -2.29 | 0.15 | 68.26  | 21.02 | 0    |
| 2.45E-07 | 0.03 | 11 | -2.28 | 0.15 | 58.57  | 18.40 | 0    |
| 2.49E-07 | 0.16 | 73 | -1.53 | 0.35 | 9.23   | 4.56  | 1.5  |
| 2.52E-07 | 0.19 | 21 | -1.31 | 0.39 | 7.11   | 3.59  | 4.9  |
| 2.54E-07 | 0.03 | 69 | -2.28 | 0.15 | 56.09  | 18.23 | 0    |
| 2.55E-07 | 0.12 | 62 | -1.81 | 0.28 | 14.55  | 6.53  | 0.6  |
| 2.56E-07 | 0.07 | 46 | -2.10 | 0.22 | 27.86  | 11.28 | 0    |
| 2.57E-07 | 0.13 | 61 | -1.69 | 0.34 | 12.39  | 5.89  | 0.5  |
| 2.61E-07 | 0.13 | 90 | -1.68 | 0.33 | 11.81  | 5.58  | 0.9  |
| 2.65E-07 | 0.16 | 68 | -1.52 | 0.36 | 9.35   | 4.47  | 1.6  |
| 2.67E-07 | 0.14 | 27 | -1.66 | 0.34 | 11.62  | 5.64  | 0.6  |
| 2.67E-07 | 0.18 | 26 | -1.43 | 0.39 | 8.27   | 4.15  | 2.7  |
| 2.68E-07 | 0.01 | 22 | -2.26 | 0.15 | 115.42 | 29.13 | 0    |
| 2.77E-07 | 0.09 | 84 | -1.98 | 0.26 | 21.28  | 8.64  | 0    |

|          |      |    |       |      |        |       |     |
|----------|------|----|-------|------|--------|-------|-----|
| 2.85E-07 | 0.16 | 67 | -1.55 | 0.36 | 10.25  | 4.91  | 1.2 |
| 2.87E-07 | 0.08 | 35 | -2.08 | 0.22 | 27.15  | 10.97 | 0   |
| 2.96E-07 | 0.01 | 61 | -2.26 | 0.15 | 135.23 | 32.52 | 0   |
| 2.99E-07 | 0.12 | 44 | -1.80 | 0.32 | 15.65  | 6.95  | 0.3 |
| 3.00E-07 | 0.19 | 2  | -1.38 | 0.40 | 8.14   | 4.11  | 3.3 |
| 3.03E-07 | 0.09 | 68 | -2.00 | 0.24 | 23.60  | 9.76  | 0   |
| 3.21E-07 | 0.09 | 72 | -2.02 | 0.26 | 24.71  | 10.18 | 0   |
| 3.23E-07 | 0.10 | 25 | -1.99 | 0.24 | 22.58  | 9.42  | 0   |
| 3.26E-07 | 0.04 | 14 | -2.30 | 0.15 | 62.74  | 21.18 | 0   |
| 3.28E-07 | 0.01 | 41 | -2.18 | 0.17 | 186.83 | 40.77 | 0   |
| 3.29E-07 | 0.05 | 60 | -2.25 | 0.18 | 46.38  | 16.37 | 0   |
| 3.30E-07 | 0.07 | 28 | -2.16 | 0.19 | 34.59  | 12.94 | 0   |
| 3.30E-07 | 0.16 | 89 | -1.62 | 0.36 | 11.95  | 5.82  | 0.6 |
| 3.36E-07 | 0.17 | 54 | -1.55 | 0.38 | 10.81  | 5.15  | 1   |
| 3.41E-07 | 0.17 | 52 | -1.53 | 0.38 | 10.72  | 5.29  | 1.1 |
| 3.43E-07 | 0.08 | 83 | -2.09 | 0.22 | 28.74  | 11.31 | 0   |
| 3.43E-07 | 0.07 | 8  | -2.12 | 0.23 | 32.72  | 12.81 | 0   |
| 3.45E-07 | 0.04 | 49 | -2.29 | 0.16 | 56.22  | 19.10 | 0   |
| 3.59E-07 | 0.08 | 28 | -2.13 | 0.21 | 33.10  | 13.05 | 0   |
| 3.60E-07 | 0.13 | 99 | -1.83 | 0.31 | 17.94  | 7.85  | 0.3 |
| 3.61E-07 | 0.17 | 96 | -1.60 | 0.37 | 12.29  | 5.89  | 0.8 |
| 3.62E-07 | 0.12 | 19 | -1.89 | 0.30 | 19.73  | 8.83  | 0.1 |
| 3.68E-07 | 0.09 | 67 | -2.07 | 0.23 | 28.56  | 10.96 | 0   |
| 3.71E-07 | 0.18 | 47 | -1.51 | 0.41 | 11.19  | 5.70  | 1.1 |
| 3.72E-07 | 0.19 | 53 | -1.47 | 0.40 | 10.56  | 5.38  | 1.2 |
| 3.76E-07 | 0.06 | 60 | -2.24 | 0.18 | 45.73  | 16.16 | 0   |
| 3.79E-07 | 0.13 | 27 | -1.84 | 0.30 | 18.51  | 7.94  | 0   |
| 3.82E-07 | 0.01 | 55 | -2.31 | 0.15 | 143.20 | 36.64 | 0   |
| 3.82E-07 | 0.18 | 87 | -1.48 | 0.43 | 10.89  | 5.42  | 1   |
| 3.85E-07 | 0.04 | 80 | -2.33 | 0.15 | 72.52  | 22.82 | 0   |
| 3.85E-07 | 0.18 | 53 | -1.56 | 0.38 | 11.71  | 5.72  | 0.9 |
| 3.87E-07 | 0.11 | 46 | -1.97 | 0.26 | 23.65  | 9.97  | 0   |
| 3.89E-07 | 0.08 | 58 | -2.15 | 0.21 | 33.83  | 13.19 | 0   |
| 3.89E-07 | 0.04 | 64 | -2.31 | 0.15 | 61.69  | 20.86 | 0   |
| 3.91E-07 | 0.06 | 96 | -2.24 | 0.17 | 47.06  | 17.70 | 0   |
| 3.91E-07 | 0.14 | 90 | -1.79 | 0.33 | 17.18  | 7.31  | 0.2 |
| 3.93E-07 | 0.00 | 82 | -2.17 | 0.16 | 224.21 | 47.82 | 0   |
| 3.93E-07 | 0.04 | 66 | -2.31 | 0.16 | 66.36  | 21.62 | 0   |
| 4.03E-07 | 0.17 | 3  | -1.60 | 0.38 | 13.05  | 6.59  | 0.7 |
| 4.12E-07 | 0.07 | 87 | -2.22 | 0.19 | 43.55  | 16.05 | 0   |
| 4.15E-07 | 0.11 | 25 | -1.96 | 0.27 | 23.90  | 10.10 | 0   |
| 4.18E-07 | 0.17 | 9  | -1.63 | 0.36 | 13.54  | 6.41  | 0.7 |
| 4.21E-07 | 0.09 | 33 | -2.10 | 0.22 | 31.44  | 12.46 | 0   |
| 4.25E-07 | 0.14 | 64 | -1.81 | 0.32 | 18.34  | 8.11  | 0.2 |
| 4.26E-07 | 0.17 | 10 | -1.66 | 0.37 | 14.63  | 6.94  | 0.2 |
| 4.28E-07 | 0.16 | 54 | -1.70 | 0.35 | 15.61  | 7.12  | 0.2 |
| 4.30E-07 | 0.14 | 3  | -1.78 | 0.33 | 17.60  | 7.78  | 0.4 |
| 4.34E-07 | 0.19 | 70 | -1.52 | 0.41 | 11.96  | 5.74  | 0.8 |
| 4.42E-07 | 0.02 | 89 | -2.35 | 0.13 | 136.15 | 36.57 | 0   |
| 4.45E-07 | 0.17 | 8  | -1.64 | 0.35 | 14.18  | 6.56  | 0.4 |
| 4.48E-07 | 0.00 | 91 | -2.21 | 0.16 | 231.58 | 51.25 | 0   |
| 4.53E-07 | 0.19 | 46 | -1.55 | 0.39 | 12.63  | 6.18  | 0.2 |

|          |      |    |       |      |        |        |     |
|----------|------|----|-------|------|--------|--------|-----|
| 4.56E-07 | 0.18 | 36 | -1.59 | 0.40 | 13.18  | 6.00   | 0.4 |
| 4.56E-07 | 0.20 | 72 | -1.48 | 0.42 | 11.67  | 5.78   | 0.7 |
| 4.57E-07 | 0.15 | 43 | -1.73 | 0.38 | 17.01  | 7.85   | 0.1 |
| 4.57E-07 | 0.19 | 27 | -1.53 | 0.42 | 12.70  | 6.33   | 0.5 |
| 4.59E-07 | 0.12 | 48 | -1.96 | 0.28 | 25.57  | 10.35  | 0.1 |
| 4.60E-07 | 0.05 | 73 | -2.30 | 0.15 | 59.54  | 20.64  | 0   |
| 4.65E-07 | 0.12 | 28 | -1.96 | 0.29 | 25.40  | 10.54  | 0.2 |
| 4.67E-07 | 0.16 | 85 | -1.70 | 0.38 | 16.03  | 7.39   | 0.2 |
| 4.72E-07 | 0.11 | 61 | -2.04 | 0.26 | 29.02  | 11.77  | 0   |
| 4.74E-07 | 0.01 | 99 | -2.34 | 0.13 | 167.56 | 42.68  | 0   |
| 4.74E-07 | 0.08 | 41 | -2.20 | 0.18 | 41.64  | 15.27  | 0   |
| 4.77E-07 | 0.00 | 80 | -0.83 | 0.47 | 627.40 | 139.04 | 0   |
| 4.79E-07 | 0.18 | 19 | -1.61 | 0.41 | 14.59  | 6.72   | 0.4 |
| 4.81E-07 | 0.16 | 58 | -1.72 | 0.35 | 16.68  | 7.84   | 0.1 |
| 4.85E-07 | 0.14 | 4  | -1.86 | 0.32 | 20.86  | 9.24   | 0.1 |
| 4.85E-07 | 0.18 | 55 | -1.61 | 0.37 | 14.39  | 6.84   | 0.6 |
| 4.86E-07 | 0.13 | 12 | -1.88 | 0.31 | 22.10  | 9.20   | 0   |
| 4.86E-07 | 0.02 | 3  | -2.37 | 0.13 | 123.78 | 35.02  | 0   |
| 4.87E-07 | 0.02 | 26 | -2.37 | 0.12 | 134.03 | 38.08  | 0   |
| 4.90E-07 | 0.10 | 81 | -2.08 | 0.22 | 31.12  | 12.53  | 0   |
| 4.93E-07 | 0.20 | 51 | -1.48 | 0.43 | 12.19  | 5.88   | 0.7 |
| 4.94E-07 | 0.05 | 3  | -2.33 | 0.15 | 69.62  | 24.17  | 0   |
| 4.99E-07 | 0.16 | 85 | -1.72 | 0.37 | 17.81  | 7.74   | 0.4 |
| 5.07E-07 | 0.13 | 74 | -1.93 | 0.28 | 23.85  | 9.99   | 0   |
| 5.09E-07 | 0.17 | 94 | -1.68 | 0.38 | 16.55  | 7.63   | 0.3 |
| 5.10E-07 | 0.00 | 36 | -2.10 | 0.16 | 305.53 | 62.92  | 0   |
| 5.11E-07 | 0.19 | 84 | -1.58 | 0.40 | 14.20  | 6.91   | 0.2 |
| 5.12E-07 | 0.01 | 75 | -2.35 | 0.13 | 167.38 | 43.15  | 0   |
| 5.23E-07 | 0.03 | 39 | -2.38 | 0.13 | 113.43 | 32.95  | 0   |
| 5.27E-07 | 0.02 | 53 | -2.37 | 0.13 | 147.88 | 39.69  | 0   |
| 5.30E-07 | 0.09 | 47 | -2.17 | 0.21 | 41.69  | 15.81  | 0   |
| 5.31E-07 | 0.09 | 63 | -2.12 | 0.24 | 37.31  | 14.98  | 0   |
| 5.41E-07 | 0.14 | 61 | -1.85 | 0.32 | 22.44  | 9.40   | 0   |
| 5.41E-07 | 0.10 | 61 | -2.12 | 0.22 | 36.47  | 13.98  | 0   |
| 5.45E-07 | 0.07 | 56 | -2.24 | 0.19 | 50.27  | 18.60  | 0   |
| 5.46E-07 | 0.09 | 94 | -2.16 | 0.21 | 40.23  | 14.84  | 0   |
| 5.47E-07 | 0.19 | 83 | -1.59 | 0.40 | 15.04  | 6.95   | 0.4 |
| 5.51E-07 | 0.09 | 87 | -2.13 | 0.23 | 38.96  | 15.11  | 0   |
| 5.56E-07 | 0.04 | 79 | -2.36 | 0.14 | 87.06  | 28.92  | 0   |
| 5.63E-07 | 0.13 | 1  | -1.94 | 0.30 | 26.14  | 10.81  | 0.1 |
| 5.64E-07 | 0.06 | 41 | -2.29 | 0.18 | 61.10  | 21.67  | 0   |
| 5.68E-07 | 0.07 | 64 | -2.24 | 0.18 | 50.63  | 18.87  | 0   |
| 5.74E-07 | 0.04 | 51 | -2.38 | 0.13 | 100.51 | 31.60  | 0   |
| 5.76E-07 | 0.09 | 69 | -2.14 | 0.23 | 40.19  | 15.82  | 0   |
| 5.78E-07 | 0.14 | 1  | -1.89 | 0.32 | 25.21  | 10.54  | 0.1 |
| 5.83E-07 | 0.12 | 71 | -2.01 | 0.28 | 30.95  | 12.68  | 0   |
| 5.86E-07 | 0.04 | 28 | -2.37 | 0.14 | 91.26  | 29.74  | 0   |
| 5.88E-07 | 0.07 | 30 | -2.27 | 0.17 | 56.32  | 20.37  | 0   |
| 5.89E-07 | 0.15 | 81 | -1.84 | 0.32 | 22.29  | 9.45   | 0.1 |
| 5.90E-07 | 0.12 | 5  | -1.99 | 0.29 | 29.80  | 11.78  | 0   |
| 5.92E-07 | 0.01 | 89 | -2.37 | 0.13 | 195.29 | 48.74  | 0   |
| 5.98E-07 | 0.06 | 26 | -2.30 | 0.16 | 64.28  | 22.73  | 0   |

|          |      |    |       |      |        |       |     |
|----------|------|----|-------|------|--------|-------|-----|
| 6.08E-07 | 0.06 | 3  | -2.29 | 0.17 | 63.58  | 23.30 | 0   |
| 6.10E-07 | 0.19 | 45 | -1.63 | 0.42 | 16.91  | 7.97  | 0.1 |
| 6.11E-07 | 0.13 | 28 | -1.93 | 0.30 | 27.21  | 11.16 | 0   |
| 6.23E-07 | 0.16 | 63 | -1.79 | 0.36 | 21.64  | 9.41  | 0.1 |
| 6.26E-07 | 0.11 | 85 | -2.09 | 0.26 | 37.70  | 15.07 | 0   |
| 6.27E-07 | 0.02 | 56 | -2.39 | 0.12 | 150.37 | 41.96 | 0   |
| 6.29E-07 | 0.07 | 90 | -2.27 | 0.18 | 59.78  | 21.29 | 0   |
| 6.32E-07 | 0.11 | 39 | -2.07 | 0.27 | 37.18  | 14.75 | 0.1 |
| 6.33E-07 | 0.13 | 23 | -1.97 | 0.29 | 29.78  | 12.50 | 0   |
| 6.34E-07 | 0.18 | 73 | -1.67 | 0.39 | 18.63  | 8.13  | 0.2 |
| 6.35E-07 | 0.15 | 35 | -1.82 | 0.37 | 23.32  | 10.26 | 0   |
| 6.41E-07 | 0.00 | 72 | -2.20 | 0.16 | 332.26 | 69.47 | 0   |
| 6.46E-07 | 0.19 | 30 | -1.67 | 0.39 | 18.02  | 8.14  | 0   |
| 6.49E-07 | 0.07 | 98 | -2.26 | 0.19 | 57.55  | 21.17 | 0   |
| 6.49E-07 | 0.01 | 31 | -2.26 | 0.13 | 298.54 | 65.21 | 0   |
| 6.50E-07 | 0.11 | 43 | -2.06 | 0.25 | 35.37  | 14.24 | 0   |
| 6.52E-07 | 0.06 | 14 | -2.31 | 0.17 | 68.58  | 24.41 | 0   |
| 6.54E-07 | 0.17 | 5  | -1.74 | 0.36 | 19.97  | 9.10  | 0.2 |
| 6.56E-07 | 0.07 | 43 | -2.31 | 0.16 | 66.06  | 22.60 | 0   |
| 6.56E-07 | 0.12 | 71 | -2.01 | 0.26 | 32.09  | 13.00 | 0.1 |
| 6.57E-07 | 0.06 | 57 | -2.33 | 0.16 | 74.95  | 26.48 | 0   |
| 6.64E-07 | 0.03 | 8  | -2.40 | 0.13 | 137.28 | 40.18 | 0   |
| 6.74E-07 | 0.07 | 19 | -2.28 | 0.18 | 64.36  | 22.75 | 0   |
| 6.75E-07 | 0.20 | 43 | -1.61 | 0.41 | 17.39  | 8.31  | 0.3 |
| 6.79E-07 | 0.17 | 2  | -1.74 | 0.39 | 20.58  | 8.97  | 0.1 |
| 6.90E-07 | 0.07 | 72 | -2.30 | 0.19 | 68.62  | 24.49 | 0   |
| 6.93E-07 | 0.17 | 87 | -1.73 | 0.41 | 21.27  | 9.37  | 0   |
| 7.00E-07 | 0.11 | 13 | -2.07 | 0.26 | 38.49  | 15.41 | 0   |
| 7.09E-07 | 0.16 | 6  | -1.82 | 0.37 | 24.06  | 10.77 | 0   |
| 7.16E-07 | 0.17 | 83 | -1.80 | 0.35 | 23.48  | 10.47 | 0.2 |
| 7.18E-07 | 0.17 | 12 | -1.75 | 0.37 | 22.84  | 10.03 | 0   |
| 7.23E-07 | 0.04 | 20 | -2.40 | 0.13 | 109.44 | 35.41 | 0   |
| 7.24E-07 | 0.03 | 10 | -2.41 | 0.12 | 139.25 | 40.94 | 0   |
| 7.27E-07 | 0.07 | 65 | -2.31 | 0.17 | 68.65  | 24.56 | 0   |
| 7.29E-07 | 0.17 | 21 | -1.78 | 0.35 | 22.90  | 10.19 | 0   |
| 7.33E-07 | 0.03 | 27 | -2.41 | 0.12 | 140.51 | 41.50 | 0   |
| 7.35E-07 | 0.11 | 57 | -2.13 | 0.26 | 42.37  | 16.46 | 0   |
| 7.38E-07 | 0.06 | 81 | -2.31 | 0.17 | 74.78  | 26.44 | 0   |
| 7.38E-07 | 0.09 | 88 | -2.22 | 0.21 | 53.99  | 20.50 | 0   |
| 7.40E-07 | 0.01 | 86 | -2.32 | 0.13 | 287.85 | 66.02 | 0   |
| 7.44E-07 | 0.11 | 35 | -2.09 | 0.26 | 40.74  | 16.46 | 0   |
| 7.45E-07 | 0.17 | 98 | -1.77 | 0.39 | 23.36  | 9.91  | 0.1 |
| 7.46E-07 | 0.13 | 95 | -1.96 | 0.31 | 32.63  | 13.66 | 0   |
| 7.46E-07 | 0.11 | 49 | -2.09 | 0.27 | 40.62  | 16.06 | 0   |
| 7.49E-07 | 0.19 | 11 | -1.69 | 0.40 | 20.67  | 9.04  | 0   |
| 7.55E-07 | 0.05 | 12 | -2.37 | 0.14 | 94.98  | 31.32 | 0   |
| 7.57E-07 | 0.08 | 5  | -2.23 | 0.21 | 58.18  | 21.59 | 0   |
| 7.58E-07 | 0.12 | 99 | -2.05 | 0.27 | 37.43  | 14.96 | 0   |
| 7.66E-07 | 0.10 | 9  | -2.14 | 0.24 | 46.15  | 17.97 | 0   |
| 7.67E-07 | 0.12 | 44 | -2.04 | 0.30 | 38.22  | 15.98 | 0   |
| 7.70E-07 | 0.12 | 50 | -2.02 | 0.29 | 36.47  | 14.27 | 0   |
| 7.73E-07 | 0.11 | 56 | -2.12 | 0.27 | 43.72  | 16.66 | 0   |

|          |      |    |       |      |        |       |      |
|----------|------|----|-------|------|--------|-------|------|
| 7.74E-07 | 0.12 | 5  | -2.04 | 0.28 | 37.34  | 14.82 | 0    |
| 7.79E-07 | 0.16 | 88 | -1.87 | 0.32 | 27.21  | 11.85 | 0    |
| 7.81E-07 | 0.11 | 88 | -2.10 | 0.24 | 42.25  | 17.24 | 0    |
| 7.84E-07 | 0.07 | 8  | -2.30 | 0.17 | 70.64  | 25.09 | 0    |
| 7.87E-07 | 0.19 | 60 | -1.69 | 0.42 | 21.37  | 9.60  | 0.1  |
| 7.89E-07 | 0.12 | 87 | -2.07 | 0.27 | 40.55  | 16.41 | 0    |
| 7.92E-07 | 0.17 | 3  | -1.81 | 0.37 | 26.10  | 11.60 | 0    |
| 7.92E-07 | 0.01 | 64 | -2.36 | 0.12 | 263.73 | 62.04 | 0    |
| 7.95E-07 | 0.06 | 65 | -2.36 | 0.15 | 88.33  | 30.44 | 0    |
| 8.02E-07 | 0.12 | 93 | -2.07 | 0.28 | 40.49  | 16.40 | 0    |
| 8.04E-07 | 0.04 | 27 | -2.41 | 0.13 | 124.75 | 38.87 | 0    |
| 8.04E-07 | 0.13 | 96 | -2.04 | 0.29 | 37.67  | 15.00 | 0    |
| 8.12E-07 | 0.06 | 47 | -2.36 | 0.16 | 90.97  | 30.83 | 0    |
| 8.24E-07 | 0.05 | 17 | -2.39 | 0.14 | 110.28 | 34.90 | 0    |
| 8.24E-07 | 0.13 | 38 | -2.05 | 0.28 | 38.65  | 15.02 | 0    |
| 8.26E-07 | 0.12 | 1  | -2.07 | 0.27 | 41.91  | 16.18 | 0    |
| 8.32E-07 | 0.15 | 42 | -1.95 | 0.31 | 32.59  | 14.11 | 0    |
| 8.34E-07 | 0.10 | 78 | -2.20 | 0.21 | 54.37  | 20.77 | 0    |
| 8.38E-07 | 0.00 | 68 | -2.23 | 0.14 | 390.48 | 83.65 | 0    |
| 8.43E-07 | 0.13 | 62 | -2.04 | 0.29 | 38.44  | 15.94 | 0    |
| 8.43E-07 | 0.00 | 32 | -2.08 | 0.16 | 458.90 | 98.30 | 0    |
| 8.43E-07 | 0.10 | 61 | -2.17 | 0.23 | 53.82  | 20.21 | 0    |
| 8.44E-07 | 0.07 | 6  | -2.32 | 0.18 | 78.95  | 28.20 | 0    |
| 8.46E-07 | 0.10 | 25 | -2.18 | 0.23 | 54.74  | 21.13 | 0    |
| 8.46E-07 | 0.18 | 6  | -1.73 | 0.38 | 24.15  | 10.74 | 0.1  |
| 8.47E-07 | 0.09 | 4  | -2.22 | 0.22 | 59.83  | 22.29 | 0    |
| 8.48E-07 | 0.11 | 53 | -2.12 | 0.25 | 48.35  | 18.70 | 0    |
| 8.51E-07 | 0.15 | 37 | -1.89 | 0.34 | 31.51  | 13.81 | 0    |
| 8.58E-07 | 0.04 | 27 | -2.41 | 0.14 | 122.95 | 37.93 | 0    |
| 8.60E-07 | 0.08 | 11 | -2.29 | 0.18 | 70.69  | 24.50 | 0    |
| 8.63E-07 | 0.02 | 82 | -2.42 | 0.12 | 209.87 | 57.67 | 0    |
| 8.68E-07 | 0.01 | 43 | -2.40 | 0.12 | 242.48 | 59.70 | 0    |
| 8.73E-07 | 0.15 | 57 | -1.91 | 0.33 | 32.32  | 13.70 | 0    |
| 8.79E-07 | 0.19 | 20 | -1.73 | 0.39 | 23.62  | 10.47 | 0.1  |
| 8.91E-07 | 0.08 | 30 | -2.28 | 0.20 | 72.92  | 26.50 | 0    |
| 8.93E-07 | 0.19 | 94 | -1.72 | 0.43 | 23.83  | 10.85 | 0    |
| 8.95E-07 | 0.09 | 77 | -2.23 | 0.21 | 61.75  | 23.18 | 0    |
| 8.95E-07 | 0.17 | 30 | -1.82 | 0.35 | 28.80  | 12.22 | 0.1  |
| 8.95E-07 | 0.07 | 69 | -2.31 | 0.17 | 79.72  | 27.37 | 0    |
| 1.03E-08 | 0.17 | 95 | -0.93 | 0.30 | 2.10   | 0.30  | 95.8 |
| 1.07E-08 | 0.04 | 48 | -1.26 | 0.24 | 3.20   | 1.43  | 40.5 |
| 1.09E-08 | 0.04 | 80 | -1.26 | 0.21 | 3.11   | 1.24  | 46   |
| 1.10E-08 | 0.03 | 44 | -1.35 | 0.26 | 4.16   | 2.01  | 16.8 |
| 1.11E-08 | 0.19 | 62 | -0.99 | 0.33 | 2.14   | 0.41  | 95.6 |
| 1.13E-08 | 0.07 | 54 | -1.18 | 0.19 | 2.51   | 0.79  | 62.6 |
| 1.14E-08 | 0.10 | 67 | -1.12 | 0.21 | 2.38   | 0.68  | 79.8 |
| 1.18E-08 | 0.19 | 97 | -0.94 | 0.28 | 2.06   | 0.23  | 94.6 |
| 1.20E-08 | 0.03 | 80 | -1.37 | 0.26 | 4.50   | 2.09  | 12.7 |
| 1.32E-08 | 0.02 | 75 | -1.47 | 0.28 | 6.06   | 2.83  | 3    |
| 1.38E-08 | 0.19 | 45 | -0.89 | 0.33 | 2.23   | 0.59  | 93.9 |
| 1.38E-08 | 0.00 | 93 | -1.23 | 0.46 | 19.67  | 6.08  | 0    |
| 1.38E-08 | 0.00 | 55 | -1.40 | 0.37 | 15.67  | 5.11  | 0    |



|          |      |    |       |      |       |      |      |
|----------|------|----|-------|------|-------|------|------|
| 1.39E-08 | 0.10 | 45 | -1.14 | 0.22 | 2.53  | 0.73 | 73.8 |
| 1.42E-08 | 0.16 | 94 | -0.96 | 0.29 | 2.20  | 0.45 | 89.5 |
| 1.49E-08 | 0.03 | 3  | -1.39 | 0.26 | 4.39  | 2.13 | 13.4 |
| 1.50E-08 | 0.17 | 35 | -1.00 | 0.24 | 2.30  | 0.52 | 89.5 |
| 1.52E-08 | 0.18 | 65 | -0.95 | 0.32 | 2.20  | 0.45 | 90.5 |
| 1.53E-08 | 0.16 | 96 | -0.99 | 0.34 | 2.17  | 0.38 | 90.6 |
| 1.59E-08 | 0.03 | 54 | -1.46 | 0.27 | 5.26  | 2.49 | 8.7  |
| 1.64E-08 | 0.10 | 51 | -1.14 | 0.23 | 2.53  | 0.81 | 69.9 |
| 1.70E-08 | 0.13 | 99 | -1.06 | 0.26 | 2.38  | 0.75 | 81.1 |
| 1.72E-08 | 0.16 | 91 | -1.01 | 0.30 | 2.28  | 0.54 | 88.8 |
| 1.78E-08 | 0.07 | 25 | -1.24 | 0.23 | 2.98  | 1.19 | 44.1 |
| 1.83E-08 | 0.00 | 99 | -1.31 | 0.42 | 24.85 | 7.28 | 0    |
| 1.83E-08 | 0.19 | 81 | -0.97 | 0.34 | 2.22  | 0.47 | 91.4 |
| 1.86E-08 | 0.17 | 34 | -1.02 | 0.27 | 2.35  | 0.61 | 86.4 |
| 1.88E-08 | 0.04 | 20 | -1.40 | 0.25 | 4.24  | 1.92 | 16.3 |
| 1.94E-08 | 0.03 | 67 | -1.52 | 0.27 | 6.06  | 2.76 | 5    |
| 2.00E-08 | 0.15 | 2  | -1.04 | 0.25 | 2.40  | 0.72 | 80.2 |
| 2.01E-08 | 0.12 | 90 | -1.11 | 0.26 | 2.53  | 0.80 | 68   |
| 2.06E-08 | 0.03 | 66 | -1.50 | 0.28 | 5.63  | 2.61 | 6.3  |
| 2.08E-08 | 0.09 | 37 | -1.20 | 0.23 | 2.82  | 1.04 | 52.9 |
| 2.08E-08 | 0.04 | 79 | -1.40 | 0.26 | 4.41  | 2.14 | 13.7 |
| 2.10E-08 | 0.19 | 92 | -0.93 | 0.31 | 2.30  | 0.53 | 86.8 |
| 2.14E-08 | 0.19 | 98 | -1.02 | 0.29 | 2.35  | 0.64 | 86.8 |
| 2.17E-08 | 0.13 | 68 | -1.10 | 0.27 | 2.61  | 0.96 | 68.1 |
| 2.18E-08 | 0.02 | 96 | -1.66 | 0.26 | 9.52  | 4.00 | 0.6  |
| 2.19E-08 | 0.09 | 59 | -1.20 | 0.24 | 2.88  | 1.11 | 50.7 |
| 2.27E-08 | 0.05 | 6  | -1.41 | 0.25 | 4.43  | 2.10 | 17   |
| 2.28E-08 | 0.19 | 13 | -0.96 | 0.30 | 2.20  | 0.46 | 88.1 |
| 2.34E-08 | 0.19 | 66 | -0.98 | 0.31 | 2.32  | 0.64 | 84.8 |
| 2.37E-08 | 0.00 | 88 | -1.37 | 0.41 | 30.97 | 8.49 | 0    |
| 2.42E-08 | 0.11 | 4  | -1.16 | 0.25 | 2.78  | 1.09 | 56   |
| 2.43E-08 | 0.14 | 61 | -1.07 | 0.23 | 2.44  | 0.73 | 71.6 |
| 2.44E-08 | 0.16 | 81 | -1.07 | 0.28 | 2.52  | 0.77 | 79.5 |
| 2.44E-08 | 0.01 | 63 | -1.69 | 0.29 | 20.76 | 6.63 | 0    |
| 2.50E-08 | 0.01 | 45 | -1.75 | 0.27 | 17.15 | 6.03 | 0    |
| 2.51E-08 | 0.19 | 52 | -0.98 | 0.32 | 2.36  | 0.68 | 83.5 |
| 2.52E-08 | 0.13 | 66 | -1.12 | 0.26 | 2.65  | 0.93 | 64.5 |
| 2.59E-08 | 0.12 | 74 | -1.11 | 0.27 | 2.72  | 1.03 | 60.2 |
| 2.61E-08 | 0.16 | 46 | -1.05 | 0.25 | 2.41  | 0.73 | 77.7 |
| 2.63E-08 | 0.08 | 13 | -1.29 | 0.25 | 3.54  | 1.54 | 31.3 |
| 2.64E-08 | 0.07 | 27 | -1.33 | 0.26 | 3.79  | 1.77 | 23.5 |
| 2.70E-08 | 0.20 | 30 | -0.95 | 0.32 | 2.35  | 0.66 | 83   |
| 2.71E-08 | 0.19 | 16 | -0.95 | 0.34 | 2.39  | 0.65 | 82   |
| 2.72E-08 | 0.18 | 60 | -1.00 | 0.31 | 2.39  | 0.69 | 78.8 |
| 2.73E-08 | 0.05 | 32 | -1.45 | 0.26 | 4.90  | 2.24 | 12.7 |
| 2.74E-08 | 0.13 | 93 | -1.12 | 0.27 | 2.72  | 1.04 | 63.6 |
| 2.75E-08 | 0.19 | 43 | -0.94 | 0.34 | 2.43  | 0.77 | 81.6 |
| 2.77E-08 | 0.14 | 48 | -1.10 | 0.27 | 2.63  | 0.93 | 64.1 |
| 2.77E-08 | 0.01 | 50 | -1.79 | 0.25 | 16.84 | 5.91 | 0.1  |
| 2.78E-08 | 0.16 | 29 | -1.08 | 0.28 | 2.63  | 0.91 | 73.6 |
| 2.80E-08 | 0.12 | 23 | -1.14 | 0.23 | 2.77  | 1.07 | 55.7 |
| 2.81E-08 | 0.12 | 73 | -1.12 | 0.28 | 2.76  | 1.07 | 60.4 |

|          |      |    |       |      |       |       |      |
|----------|------|----|-------|------|-------|-------|------|
| 2.83E-08 | 0.18 | 30 | -0.98 | 0.32 | 2.42  | 0.73  | 79.7 |
| 2.87E-08 | 0.02 | 96 | -1.77 | 0.24 | 12.41 | 4.85  | 0.1  |
| 2.93E-08 | 0.13 | 74 | -1.09 | 0.29 | 2.74  | 1.01  | 57.5 |
| 3.02E-08 | 0.19 | 90 | -0.98 | 0.29 | 2.37  | 0.66  | 78.8 |
| 3.03E-08 | 0.04 | 15 | -1.59 | 0.25 | 6.71  | 3.20  | 3.5  |
| 3.03E-08 | 0.07 | 78 | -1.31 | 0.26 | 3.77  | 1.80  | 21.6 |
| 3.04E-08 | 0.07 | 19 | -1.36 | 0.26 | 4.05  | 1.93  | 19.9 |
| 3.11E-08 | 0.02 | 14 | -1.74 | 0.25 | 10.40 | 4.45  | 0.7  |
| 3.11E-08 | 0.11 | 53 | -1.17 | 0.27 | 3.00  | 1.26  | 49.7 |
| 3.15E-08 | 0.01 | 66 | -1.74 | 0.28 | 27.55 | 7.94  | 0    |
| 3.16E-08 | 0.04 | 24 | -1.60 | 0.26 | 6.85  | 3.17  | 3.6  |
| 3.19E-08 | 0.13 | 32 | -1.15 | 0.26 | 2.90  | 1.14  | 52.6 |
| 3.29E-08 | 0.19 | 55 | -1.01 | 0.29 | 2.45  | 0.79  | 79.8 |
| 3.29E-08 | 0.07 | 45 | -1.38 | 0.26 | 4.32  | 2.01  | 17.5 |
| 3.30E-08 | 0.13 | 22 | -1.15 | 0.28 | 2.97  | 1.23  | 54   |
| 3.33E-08 | 0.16 | 62 | -1.06 | 0.29 | 2.61  | 0.96  | 65.5 |
| 3.34E-08 | 0.13 | 33 | -1.14 | 0.30 | 2.89  | 1.18  | 54.7 |
| 3.40E-08 | 0.08 | 81 | -1.34 | 0.27 | 4.01  | 1.95  | 20.4 |
| 3.47E-08 | 0.04 | 47 | -1.64 | 0.26 | 7.69  | 3.58  | 2    |
| 3.54E-08 | 0.14 | 18 | -1.11 | 0.27 | 2.76  | 1.07  | 57.6 |
| 3.59E-08 | 0.03 | 77 | -1.71 | 0.26 | 9.07  | 3.99  | 1.7  |
| 3.61E-08 | 0.08 | 63 | -1.36 | 0.25 | 4.16  | 1.96  | 17.6 |
| 3.64E-08 | 0.14 | 40 | -1.13 | 0.28 | 2.92  | 1.18  | 50.4 |
| 3.67E-08 | 0.09 | 24 | -1.31 | 0.28 | 3.78  | 1.79  | 24.7 |
| 3.74E-08 | 0.09 | 24 | -1.31 | 0.29 | 3.90  | 1.79  | 22.9 |
| 3.80E-08 | 0.10 | 31 | -1.28 | 0.28 | 3.63  | 1.63  | 31.5 |
| 3.83E-08 | 0.19 | 84 | -0.95 | 0.35 | 2.52  | 0.83  | 70.1 |
| 3.88E-08 | 0.16 | 45 | -1.07 | 0.32 | 2.71  | 0.97  | 63.5 |
| 3.89E-08 | 0.07 | 71 | -1.39 | 0.28 | 4.54  | 2.12  | 15.3 |
| 3.97E-08 | 0.12 | 59 | -1.18 | 0.26 | 3.09  | 1.29  | 42.4 |
| 3.98E-08 | 0.11 | 14 | -1.22 | 0.27 | 3.37  | 1.52  | 32.7 |
| 4.00E-08 | 0.01 | 65 | -1.85 | 0.25 | 31.47 | 8.79  | 0    |
| 4.01E-08 | 0.18 | 81 | -1.03 | 0.32 | 2.62  | 0.90  | 67.2 |
| 4.07E-08 | 0.00 | 33 | -1.73 | 0.28 | 40.54 | 10.68 | 0    |
| 4.10E-08 | 0.18 | 67 | -1.04 | 0.33 | 2.58  | 0.84  | 66.2 |
| 4.17E-08 | 0.06 | 43 | -1.49 | 0.28 | 5.52  | 2.77  | 9.5  |
| 4.18E-08 | 0.01 | 58 | -1.91 | 0.22 | 22.10 | 7.37  | 0    |
| 4.22E-08 | 0.07 | 87 | -1.45 | 0.27 | 5.07  | 2.60  | 10.6 |
| 4.23E-08 | 0.06 | 3  | -1.53 | 0.27 | 5.83  | 2.75  | 6    |
| 4.23E-08 | 0.07 | 83 | -1.46 | 0.27 | 5.12  | 2.46  | 10.4 |
| 4.31E-08 | 0.09 | 49 | -1.32 | 0.27 | 4.04  | 2.05  | 20.6 |
| 4.31E-08 | 0.12 | 19 | -1.20 | 0.27 | 3.32  | 1.40  | 36.3 |
| 4.41E-08 | 0.15 | 4  | -1.12 | 0.29 | 3.00  | 1.25  | 51.3 |
| 4.42E-08 | 0.17 | 47 | -1.07 | 0.31 | 2.80  | 1.09  | 58.8 |
| 4.43E-08 | 0.05 | 28 | -1.63 | 0.27 | 7.39  | 3.56  | 2.5  |
| 4.45E-08 | 0.01 | 67 | -1.84 | 0.26 | 37.08 | 10.22 | 0    |
| 4.51E-08 | 0.12 | 30 | -1.23 | 0.28 | 3.52  | 1.58  | 34   |
| 4.52E-08 | 0.01 | 67 | -1.90 | 0.24 | 31.81 | 9.51  | 0    |
| 4.53E-08 | 0.07 | 27 | -1.47 | 0.28 | 5.34  | 2.59  | 7.8  |
| 4.53E-08 | 0.05 | 7  | -1.64 | 0.28 | 7.63  | 3.51  | 2.8  |
| 4.58E-08 | 0.08 | 11 | -1.39 | 0.26 | 4.57  | 2.19  | 13.1 |
| 4.60E-08 | 0.02 | 76 | -1.94 | 0.21 | 22.12 | 7.43  | 0    |

|          |      |    |       |      |       |       |      |
|----------|------|----|-------|------|-------|-------|------|
| 4.65E-08 | 0.09 | 88 | -1.38 | 0.27 | 4.43  | 2.15  | 15.6 |
| 4.70E-08 | 0.17 | 77 | -1.06 | 0.32 | 2.92  | 1.25  | 56   |
| 4.74E-08 | 0.15 | 44 | -1.10 | 0.31 | 3.01  | 1.36  | 49   |
| 4.77E-08 | 0.14 | 52 | -1.14 | 0.33 | 3.19  | 1.46  | 42.1 |
| 4.78E-08 | 0.15 | 82 | -1.12 | 0.31 | 3.08  | 1.28  | 45.5 |
| 4.79E-08 | 0.18 | 48 | -1.05 | 0.30 | 2.71  | 0.99  | 60.5 |
| 4.81E-08 | 0.15 | 61 | -1.12 | 0.31 | 3.07  | 1.32  | 44.4 |
| 4.94E-08 | 0.06 | 49 | -1.61 | 0.27 | 7.05  | 3.42  | 2.4  |
| 4.95E-08 | 0.13 | 84 | -1.21 | 0.26 | 3.46  | 1.48  | 34.5 |
| 4.96E-08 | 0.12 | 73 | -1.23 | 0.29 | 3.63  | 1.66  | 29.9 |
| 4.97E-08 | 0.11 | 29 | -1.28 | 0.31 | 3.91  | 1.90  | 26.2 |
| 5.01E-08 | 0.01 | 31 | -1.97 | 0.21 | 28.86 | 8.91  | 0    |
| 5.11E-08 | 0.17 | 63 | -1.07 | 0.33 | 2.92  | 1.15  | 49.4 |
| 5.14E-08 | 0.16 | 86 | -1.10 | 0.30 | 3.01  | 1.23  | 49.4 |
| 5.16E-08 | 0.09 | 20 | -1.38 | 0.29 | 4.65  | 2.23  | 12.2 |
| 5.18E-08 | 0.16 | 41 | -1.09 | 0.30 | 3.02  | 1.19  | 50.1 |
| 5.19E-08 | 0.06 | 41 | -1.60 | 0.28 | 6.86  | 3.36  | 4.8  |
| 5.28E-08 | 0.04 | 71 | -1.78 | 0.25 | 10.46 | 4.49  | 0.6  |
| 5.28E-08 | 0.06 | 46 | -1.57 | 0.28 | 6.61  | 3.21  | 4.1  |
| 5.32E-08 | 0.01 | 60 | -1.95 | 0.23 | 36.12 | 10.16 | 0    |
| 5.34E-08 | 0.20 | 42 | -0.99 | 0.34 | 2.66  | 0.95  | 60.1 |
| 5.37E-08 | 0.11 | 82 | -1.32 | 0.28 | 4.16  | 1.95  | 22.4 |
| 5.38E-08 | 0.12 | 96 | -1.26 | 0.29 | 3.82  | 1.73  | 22.7 |
| 5.38E-08 | 0.14 | 26 | -1.17 | 0.31 | 3.34  | 1.45  | 36.5 |
| 5.42E-08 | 0.01 | 87 | -1.90 | 0.24 | 40.92 | 10.81 | 0    |
| 5.45E-08 | 0.12 | 11 | -1.24 | 0.28 | 3.68  | 1.62  | 26.4 |
| 5.48E-08 | 0.11 | 20 | -1.30 | 0.30 | 4.13  | 1.95  | 18.7 |
| 5.56E-08 | 0.10 | 53 | -1.33 | 0.29 | 4.37  | 2.12  | 18   |
| 5.57E-08 | 0.13 | 51 | -1.23 | 0.30 | 3.67  | 1.83  | 27.5 |
| 5.57E-08 | 0.18 | 80 | -1.08 | 0.31 | 3.08  | 1.26  | 50.6 |
| 5.58E-08 | 0.19 | 78 | -1.02 | 0.35 | 2.83  | 1.08  | 58.5 |
| 5.61E-08 | 0.06 | 29 | -1.67 | 0.26 | 8.05  | 3.73  | 2.3  |
| 5.61E-08 | 0.11 | 61 | -1.31 | 0.29 | 4.12  | 1.92  | 23.2 |
| 5.64E-08 | 0.20 | 54 | -1.00 | 0.32 | 2.84  | 1.11  | 58.6 |
| 5.64E-08 | 0.19 | 14 | -1.03 | 0.35 | 2.92  | 1.15  | 55.1 |
| 5.67E-08 | 0.18 | 63 | -1.04 | 0.32 | 2.88  | 1.18  | 56   |
| 5.69E-08 | 0.10 | 95 | -1.39 | 0.30 | 4.83  | 2.40  | 14.4 |
| 5.77E-08 | 0.04 | 73 | -1.87 | 0.22 | 13.03 | 5.21  | 0.1  |
| 5.81E-08 | 0.15 | 22 | -1.16 | 0.31 | 3.38  | 1.53  | 37.4 |
| 5.83E-08 | 0.13 | 78 | -1.21 | 0.29 | 3.55  | 1.65  | 29.4 |
| 5.83E-08 | 0.05 | 9  | -1.72 | 0.26 | 9.01  | 4.18  | 1.4  |
| 5.89E-08 | 0.03 | 55 | -1.98 | 0.21 | 19.13 | 6.97  | 0    |
| 5.97E-08 | 0.15 | 64 | -1.14 | 0.32 | 3.37  | 1.49  | 36.8 |
| 5.98E-08 | 0.04 | 11 | -1.83 | 0.25 | 11.91 | 4.96  | 0.4  |
| 6.04E-08 | 0.15 | 32 | -1.16 | 0.29 | 3.32  | 1.42  | 35.1 |
| 6.04E-08 | 0.05 | 38 | -1.79 | 0.26 | 10.77 | 4.82  | 0.9  |
| 6.05E-08 | 0.17 | 29 | -1.11 | 0.30 | 3.13  | 1.26  | 42.4 |
| 6.08E-08 | 0.08 | 58 | -1.51 | 0.29 | 6.10  | 3.02  | 6.6  |
| 6.09E-08 | 0.08 | 40 | -1.51 | 0.29 | 6.07  | 2.96  | 6.1  |
| 6.10E-08 | 0.04 | 95 | -1.86 | 0.24 | 12.67 | 5.25  | 0.1  |
| 6.17E-08 | 0.09 | 70 | -1.41 | 0.31 | 5.19  | 2.54  | 11.3 |
| 6.18E-08 | 0.00 | 23 | -1.76 | 0.28 | 61.18 | 15.79 | 0    |

|          |      |    |       |      |       |       |      |
|----------|------|----|-------|------|-------|-------|------|
| 6.20E-08 | 0.00 | 10 | -1.47 | 0.37 | 78.73 | 18.20 | 0    |
| 6.25E-08 | 0.04 | 61 | -1.85 | 0.24 | 11.91 | 5.03  | 0.6  |
| 6.26E-08 | 0.01 | 3  | -1.91 | 0.24 | 49.66 | 12.79 | 0    |
| 6.28E-08 | 0.09 | 42 | -1.43 | 0.29 | 5.27  | 2.55  | 7.9  |
| 6.29E-08 | 0.06 | 28 | -1.66 | 0.27 | 8.06  | 3.73  | 2.9  |
| 6.29E-08 | 0.12 | 38 | -1.30 | 0.30 | 4.26  | 2.04  | 17.7 |
| 6.30E-08 | 0.03 | 39 | -1.97 | 0.21 | 18.09 | 6.83  | 0.1  |
| 6.33E-08 | 0.12 | 8  | -1.30 | 0.30 | 4.22  | 2.04  | 18.2 |
| 6.35E-08 | 0.18 | 63 | -1.07 | 0.33 | 3.12  | 1.31  | 45.9 |
| 6.38E-08 | 0.09 | 37 | -1.43 | 0.30 | 5.28  | 2.70  | 7.9  |
| 6.39E-08 | 0.14 | 87 | -1.21 | 0.30 | 3.74  | 1.72  | 25.8 |
| 6.44E-08 | 0.06 | 87 | -1.68 | 0.26 | 8.29  | 3.84  | 1.4  |
| 6.51E-08 | 0.18 | 9  | -1.02 | 0.37 | 3.01  | 1.20  | 45.9 |
| 6.52E-08 | 0.06 | 46 | -1.73 | 0.28 | 9.52  | 4.55  | 1.5  |
| 6.55E-08 | 0.02 | 90 | -2.03 | 0.19 | 27.29 | 8.98  | 0    |
| 6.60E-08 | 0.11 | 38 | -1.37 | 0.31 | 4.79  | 2.43  | 14   |
| 6.63E-08 | 0.10 | 94 | -1.38 | 0.31 | 4.86  | 2.45  | 11.8 |
| 6.63E-08 | 0.17 | 48 | -1.12 | 0.31 | 3.19  | 1.34  | 38.4 |
| 6.66E-08 | 0.16 | 91 | -1.14 | 0.32 | 3.48  | 1.57  | 33.5 |
| 6.70E-08 | 0.11 | 22 | -1.35 | 0.31 | 4.71  | 2.35  | 13.9 |
| 6.78E-08 | 0.14 | 17 | -1.21 | 0.32 | 3.75  | 1.68  | 26.2 |
| 6.78E-08 | 0.17 | 39 | -1.10 | 0.37 | 3.27  | 1.42  | 40.7 |
| 6.84E-08 | 0.01 | 27 | -1.95 | 0.24 | 54.12 | 13.78 | 0    |
| 6.84E-08 | 0.13 | 92 | -1.29 | 0.31 | 4.21  | 2.01  | 20.4 |
| 6.88E-08 | 0.16 | 37 | -1.12 | 0.33 | 3.39  | 1.53  | 33.1 |
| 6.89E-08 | 0.05 | 52 | -1.84 | 0.24 | 12.02 | 5.18  | 0.2  |
| 6.90E-08 | 0.11 | 83 | -1.36 | 0.31 | 4.79  | 2.36  | 13.4 |
| 6.90E-08 | 0.04 | 30 | -1.91 | 0.24 | 14.60 | 5.86  | 0.2  |
| 7.10E-08 | 0.01 | 9  | -2.04 | 0.20 | 38.60 | 11.53 | 0    |
| 7.16E-08 | 0.12 | 33 | -1.32 | 0.31 | 4.46  | 2.13  | 16.5 |
| 7.19E-08 | 0.11 | 12 | -1.38 | 0.29 | 4.99  | 2.47  | 11.6 |
| 7.21E-08 | 0.10 | 75 | -1.44 | 0.31 | 5.47  | 2.79  | 9.5  |
| 7.25E-08 | 0.10 | 67 | -1.43 | 0.30 | 5.43  | 2.55  | 9.8  |
| 7.27E-08 | 0.12 | 22 | -1.35 | 0.29 | 4.75  | 2.19  | 13   |
| 7.32E-08 | 0.15 | 77 | -1.20 | 0.32 | 3.73  | 1.82  | 26.4 |
| 7.39E-08 | 0.07 | 6  | -1.68 | 0.28 | 8.59  | 4.08  | 2.1  |
| 7.41E-08 | 0.05 | 80 | -1.80 | 0.25 | 10.93 | 4.87  | 0.3  |
| 7.48E-08 | 0.01 | 62 | -2.04 | 0.20 | 42.51 | 12.24 | 0    |
| 7.53E-08 | 0.04 | 85 | -1.98 | 0.21 | 17.44 | 6.94  | 0    |
| 7.58E-08 | 0.11 | 18 | -1.41 | 0.31 | 5.28  | 2.70  | 10.7 |
| 7.64E-08 | 0.14 | 65 | -1.24 | 0.33 | 4.09  | 2.01  | 21.7 |
| 7.64E-08 | 0.20 | 81 | -1.04 | 0.35 | 3.11  | 1.29  | 43.4 |
| 7.65E-08 | 0.10 | 41 | -1.44 | 0.29 | 5.50  | 2.62  | 8.3  |
| 7.67E-08 | 0.04 | 34 | -1.98 | 0.21 | 17.65 | 6.70  | 0.1  |
| 7.70E-08 | 0.10 | 4  | -1.43 | 0.31 | 5.47  | 2.66  | 8.6  |
| 7.70E-08 | 0.12 | 48 | -1.35 | 0.29 | 4.81  | 2.35  | 15.4 |
| 7.72E-08 | 0.11 | 87 | -1.41 | 0.31 | 5.42  | 2.70  | 8.8  |
| 7.75E-08 | 0.10 | 9  | -1.43 | 0.32 | 5.55  | 2.73  | 9.1  |
| 7.75E-08 | 0.20 | 69 | -1.05 | 0.33 | 3.12  | 1.29  | 44.8 |
| 7.78E-08 | 0.16 | 62 | -1.18 | 0.35 | 3.75  | 1.69  | 27.6 |
| 7.82E-08 | 0.07 | 67 | -1.71 | 0.27 | 9.20  | 4.19  | 1.8  |
| 7.94E-08 | 0.14 | 54 | -1.23 | 0.33 | 4.05  | 1.96  | 22.7 |

|          |      |    |       |      |       |       |      |
|----------|------|----|-------|------|-------|-------|------|
| 7.97E-08 | 0.05 | 8  | -1.86 | 0.23 | 12.50 | 5.35  | 0.4  |
| 7.98E-08 | 0.17 | 61 | -1.11 | 0.35 | 3.48  | 1.60  | 31.1 |
| 7.99E-08 | 0.02 | 60 | -2.09 | 0.18 | 38.34 | 11.27 | 0    |
| 8.02E-08 | 0.03 | 35 | -2.04 | 0.18 | 21.93 | 8.00  | 0.1  |
| 8.03E-08 | 0.08 | 31 | -1.64 | 0.28 | 7.85  | 3.88  | 2.3  |
| 8.13E-08 | 0.06 | 34 | -1.76 | 0.26 | 10.16 | 4.64  | 1    |
| 8.14E-08 | 0.08 | 58 | -1.60 | 0.28 | 7.36  | 3.52  | 3    |
| 8.27E-08 | 0.04 | 10 | -1.93 | 0.23 | 15.22 | 6.20  | 0    |
| 8.32E-08 | 0.07 | 32 | -1.73 | 0.25 | 9.66  | 4.41  | 1    |
| 8.32E-08 | 0.20 | 7  | -1.06 | 0.36 | 3.34  | 1.51  | 40.8 |
| 8.34E-08 | 0.04 | 20 | -1.96 | 0.21 | 16.27 | 6.31  | 0    |
| 8.36E-08 | 0.11 | 73 | -1.46 | 0.30 | 5.86  | 2.88  | 7.4  |
| 8.38E-08 | 0.02 | 68 | -2.09 | 0.19 | 29.35 | 9.70  | 0    |
| 8.44E-08 | 0.17 | 94 | -1.12 | 0.37 | 3.55  | 1.74  | 31.5 |
| 8.49E-08 | 0.01 | 82 | -2.01 | 0.22 | 59.35 | 15.85 | 0    |
| 8.51E-08 | 0.04 | 81 | -2.00 | 0.20 | 18.04 | 6.68  | 0    |
| 8.52E-08 | 0.10 | 39 | -1.48 | 0.30 | 6.03  | 3.05  | 6.3  |
| 8.54E-08 | 0.07 | 95 | -1.74 | 0.27 | 9.98  | 4.71  | 1.2  |
| 8.60E-08 | 0.15 | 16 | -1.20 | 0.34 | 4.10  | 2.01  | 20.2 |
| 8.70E-08 | 0.16 | 29 | -1.20 | 0.33 | 3.85  | 1.84  | 25.4 |
| 8.70E-08 | 0.06 | 80 | -1.81 | 0.26 | 11.14 | 4.82  | 0.9  |
| 8.78E-08 | 0.02 | 70 | -2.10 | 0.18 | 29.64 | 9.70  | 0    |
| 8.78E-08 | 0.05 | 26 | -1.91 | 0.23 | 14.48 | 5.88  | 0.1  |
| 8.83E-08 | 0.01 | 60 | -2.10 | 0.19 | 47.20 | 13.15 | 0    |
| 8.85E-08 | 0.00 | 87 | -1.91 | 0.24 | 76.38 | 18.27 | 0    |
| 8.87E-08 | 0.10 | 9  | -1.47 | 0.31 | 6.02  | 2.96  | 5.5  |
| 8.90E-08 | 0.06 | 5  | -1.86 | 0.25 | 12.60 | 5.35  | 0.4  |
| 8.97E-08 | 0.16 | 63 | -1.20 | 0.35 | 4.08  | 1.96  | 21.6 |
| 8.99E-08 | 0.02 | 77 | -2.10 | 0.18 | 29.65 | 9.61  | 0    |
| 1.01E-09 | 0.16 | 90 | -1.15 | NA   | 2.00  | NA    | 99.9 |
| 1.01E-09 | 0.03 | 96 | -1.09 | 0.16 | 2.05  | 0.21  | 95.7 |
| 1.04E-09 | 0.11 | 50 | -0.63 | NA   | 2.00  | NA    | 99.9 |
| 1.04E-09 | 0.11 | 89 | -1.15 | NA   | 2.00  | NA    | 99.9 |
| 1.07E-09 | 0.06 | 82 | -1.05 | 0.17 | 2.00  | 0.00  | 98.8 |
| 1.17E-09 | 0.01 | 7  | -0.98 | 0.30 | 2.45  | 0.77  | 74.6 |
| 1.21E-09 | 0.13 | 61 | -1.07 | NA   | 2.00  | NA    | 99.9 |
| 1.25E-09 | 0.09 | 49 | -1.03 | 0.30 | 2.17  | 0.39  | 98.8 |
| 1.31E-09 | 0.04 | 61 | -1.12 | 0.14 | 2.13  | 0.34  | 96.8 |
| 1.41E-09 | 0.01 | 87 | -1.01 | 0.28 | 2.39  | 0.61  | 79.6 |
| 1.52E-09 | 0.12 | 65 | -1.00 | 0.07 | 2.00  | 0.00  | 99.7 |
| 1.52E-09 | 0.19 | 79 | -1.15 | 0.00 | 2.00  | 0.00  | 99.8 |
| 1.62E-09 | 0.01 | 11 | -1.06 | 0.30 | 2.47  | 0.76  | 72   |
| 1.63E-09 | 0.09 | 87 | -1.15 | 0.08 | 2.00  | 0.00  | 99.7 |
| 1.68E-09 | 0.13 | 44 | -0.84 | 0.33 | 2.00  | 0.00  | 99.3 |
| 1.76E-09 | 0.04 | 9  | -1.11 | 0.21 | 2.22  | 0.50  | 94.5 |
| 1.81E-09 | 0.08 | 91 | -1.09 | 0.14 | 2.00  | 0.00  | 98.7 |
| 1.86E-09 | 0.03 | 24 | -1.09 | 0.21 | 2.29  | 0.60  | 85.6 |
| 1.89E-09 | 0.03 | 37 | -1.11 | 0.20 | 2.27  | 0.54  | 91.4 |
| 1.89E-09 | 0.02 | 56 | -1.09 | 0.22 | 2.35  | 0.63  | 78.8 |
| 1.89E-09 | 0.05 | 78 | -1.12 | 0.21 | 2.13  | 0.40  | 96   |
| 1.90E-09 | 0.11 | 82 | -0.92 | 0.24 | 2.00  | 0.00  | 98.7 |
| 1.93E-09 | 0.02 | 89 | -1.09 | 0.21 | 2.33  | 0.57  | 78.9 |

|          |      |    |       |      |      |      |      |
|----------|------|----|-------|------|------|------|------|
| 1.95E-09 | 0.11 | 1  | -1.01 | 0.22 | 2.09 | 0.30 | 98.9 |
| 1.97E-09 | 0.12 | 62 | -1.34 | 0.12 | 3.00 | 0.00 | 99.8 |
| 1.97E-09 | 0.04 | 94 | -1.12 | 0.17 | 2.21 | 0.44 | 90.9 |
| 2.00E-09 | 0.02 | 57 | -1.09 | 0.24 | 2.25 | 0.54 | 81.9 |
| 2.05E-09 | 0.02 | 26 | -1.11 | 0.20 | 2.29 | 0.64 | 79.8 |
| 2.11E-09 | 0.02 | 94 | -1.09 | 0.23 | 2.32 | 0.56 | 81.3 |
| 2.16E-09 | 0.01 | 73 | -0.99 | 0.36 | 3.05 | 1.33 | 42.7 |
| 2.19E-09 | 0.01 | 44 | -1.03 | 0.32 | 2.70 | 0.94 | 57.7 |
| 2.21E-09 | 0.04 | 23 | -1.10 | 0.23 | 2.21 | 0.55 | 92.4 |
| 2.21E-09 | 0.01 | 29 | -1.09 | 0.28 | 2.61 | 0.82 | 59.9 |
| 2.24E-09 | 0.09 | 76 | -1.05 | 0.17 | 2.00 | 0.00 | 98   |
| 2.27E-09 | 0.04 | 77 | -1.13 | 0.18 | 2.19 | 0.43 | 88.3 |
| 2.28E-09 | 0.00 | 86 | -0.46 | 0.70 | 4.60 | 2.07 | 9.5  |
| 2.29E-09 | 0.02 | 54 | -1.09 | 0.19 | 2.29 | 0.51 | 81.3 |
| 2.32E-09 | 0.04 | 70 | -1.11 | 0.19 | 2.24 | 0.51 | 91.7 |
| 2.33E-09 | 0.12 | 38 | -1.07 | 0.12 | 2.00 | 0.00 | 99.4 |
| 2.41E-09 | 0.13 | 52 | -1.10 | 0.21 | 2.22 | 0.67 | 99.1 |
| 2.47E-09 | 0.16 | 68 | -1.05 | 0.16 | 2.00 | 0.00 | 99.6 |
| 2.50E-09 | 0.18 | 59 | -0.82 | 0.05 | 2.00 | 0.00 | 99.8 |
| 2.50E-09 | 0.01 | 23 | -1.05 | 0.33 | 2.98 | 1.19 | 42.3 |
| 2.52E-09 | 0.12 | 39 | -1.07 | 0.21 | 2.00 | 0.00 | 98.9 |
| 2.56E-09 | 0.13 | 15 | -1.00 | 0.10 | 2.00 | 0.00 | 99.8 |
| 2.62E-09 | 0.10 | 78 | -1.03 | 0.25 | 2.07 | 0.27 | 98.6 |
| 2.65E-09 | 0.07 | 8  | -1.09 | 0.22 | 2.24 | 0.50 | 96.7 |
| 2.69E-09 | 0.11 | 79 | -1.05 | 0.14 | 2.00 | 0.00 | 98.4 |
| 2.78E-09 | 0.19 | 46 | -0.93 | 0.41 | 2.00 | 0.00 | 99.8 |
| 2.79E-09 | 0.05 | 50 | -1.15 | 0.17 | 2.30 | 0.55 | 89.5 |
| 2.80E-09 | 0.14 | 73 | -1.10 | 0.15 | 2.13 | 0.35 | 99.2 |
| 2.81E-09 | 0.16 | 20 | -0.73 | 0.43 | 2.00 | 0.00 | 99.7 |
| 2.87E-09 | 0.18 | 36 | -1.15 | 0.11 | 2.00 | 0.00 | 99.6 |
| 2.93E-09 | 0.18 | 32 | -0.89 | 0.21 | 2.00 | 0.00 | 99.4 |
| 2.93E-09 | 0.14 | 67 | -1.05 | 0.19 | 2.00 | 0.00 | 98.7 |
| 2.95E-09 | 0.05 | 97 | -1.08 | 0.22 | 2.13 | 0.37 | 91.5 |
| 2.95E-09 | 0.03 | 83 | -1.12 | 0.20 | 2.33 | 0.67 | 79.2 |
| 3.06E-09 | 0.06 | 66 | -1.10 | 0.18 | 2.19 | 0.49 | 94.8 |
| 3.09E-09 | 0.14 | 81 | -0.99 | 0.14 | 2.25 | 0.46 | 99.2 |
| 3.11E-09 | 0.20 | 99 | -0.93 | 0.07 | 2.00 | 0.00 | 99.7 |
| 3.12E-09 | 0.16 | 66 | -0.89 | 0.26 | 2.00 | 0.00 | 99.6 |
| 3.24E-09 | 0.12 | 96 | -1.01 | 0.18 | 2.13 | 0.34 | 98.4 |
| 3.29E-09 | 0.15 | 12 | -0.96 | 0.28 | 2.00 | 0.00 | 99.6 |
| 3.32E-09 | 0.06 | 4  | -1.12 | 0.17 | 2.20 | 0.50 | 90.5 |
| 3.34E-09 | 0.13 | 16 | -0.97 | 0.23 | 2.00 | 0.00 | 98.9 |
| 3.36E-09 | 0.09 | 85 | -1.11 | 0.17 | 2.21 | 0.41 | 96.6 |
| 3.41E-09 | 0.14 | 29 | -0.93 | 0.24 | 2.08 | 0.28 | 98.7 |
| 3.45E-09 | 0.12 | 51 | -1.04 | 0.19 | 2.00 | 0.00 | 97.4 |
| 3.46E-09 | 0.07 | 37 | -1.07 | 0.19 | 2.13 | 0.33 | 94.4 |
| 3.47E-09 | 0.04 | 87 | -1.15 | 0.17 | 2.29 | 0.58 | 77.6 |
| 3.48E-09 | 0.18 | 35 | -1.15 | 0.11 | 2.00 | 0.00 | 99.8 |
| 3.54E-09 | 0.20 | 50 | -0.85 | 0.42 | 2.00 | 0.00 | 99.3 |
| 3.55E-09 | 0.19 | 20 | -1.15 | 0.16 | 2.22 | 0.44 | 99.1 |
| 3.56E-09 | 0.15 | 57 | -0.96 | 0.27 | 2.18 | 0.60 | 98.9 |
| 3.60E-09 | 0.01 | 50 | -1.11 | 0.32 | 3.45 | 1.46 | 27.2 |

|          |      |    |       |      |      |      |      |
|----------|------|----|-------|------|------|------|------|
| 3.64E-09 | 0.09 | 90 | -1.11 | 0.16 | 2.06 | 0.24 | 96.7 |
| 3.68E-09 | 0.19 | 26 | -0.96 | 0.22 | 2.13 | 0.35 | 99.2 |
| 3.72E-09 | 0.12 | 96 | -0.96 | 0.39 | 2.00 | 0.00 | 98.9 |
| 3.74E-09 | 0.04 | 29 | -1.13 | 0.18 | 2.32 | 0.58 | 81.4 |
| 3.84E-09 | 0.16 | 28 | -0.94 | 0.35 | 2.11 | 0.33 | 99.1 |
| 3.86E-09 | 0.11 | 65 | -1.06 | 0.22 | 2.04 | 0.20 | 97.6 |
| 3.86E-09 | 0.14 | 45 | -1.02 | 0.23 | 2.09 | 0.30 | 98.9 |
| 3.87E-09 | 0.15 | 1  | -1.00 | 0.30 | 2.00 | 0.00 | 98.2 |
| 3.89E-09 | 0.03 | 76 | -1.15 | 0.19 | 2.44 | 0.74 | 72.1 |
| 3.89E-09 | 0.05 | 20 | -1.15 | 0.20 | 2.37 | 0.59 | 86.3 |
| 3.91E-09 | 0.05 | 6  | -1.16 | 0.17 | 2.39 | 0.64 | 83.7 |
| 3.98E-09 | 0.12 | 68 | -1.02 | 0.26 | 2.11 | 0.32 | 98.2 |
| 4.03E-09 | 0.11 | 10 | -1.09 | 0.20 | 2.16 | 0.37 | 96.9 |
| 4.05E-09 | 0.08 | 59 | -1.07 | 0.19 | 2.08 | 0.27 | 93.8 |
| 4.13E-09 | 0.05 | 85 | -1.13 | 0.20 | 2.28 | 0.57 | 86.7 |
| 4.15E-09 | 0.07 | 56 | -1.13 | 0.16 | 2.23 | 0.49 | 90   |
| 4.18E-09 | 0.02 | 75 | -1.16 | 0.26 | 3.11 | 1.25 | 37.9 |
| 4.21E-09 | 0.09 | 90 | -1.06 | 0.20 | 2.14 | 0.39 | 93.6 |
| 4.21E-09 | 0.06 | 21 | -1.09 | 0.18 | 2.18 | 0.44 | 90   |
| 4.21E-09 | 0.14 | 11 | -0.95 | 0.27 | 2.06 | 0.24 | 98.2 |
| 4.22E-09 | 0.08 | 55 | -1.10 | 0.22 | 2.17 | 0.42 | 93   |
| 4.22E-09 | 0.00 | 2  | -0.69 | 0.57 | 7.52 | 2.97 | 1.1  |
| 4.23E-09 | 0.13 | 99 | -1.08 | 0.11 | 2.19 | 0.40 | 97.9 |
| 4.24E-09 | 0.16 | 25 | -1.02 | 0.25 | 2.00 | 0.00 | 98.6 |
| 4.24E-09 | 0.10 | 69 | -1.08 | 0.17 | 2.17 | 0.45 | 96.5 |
| 4.30E-09 | 0.02 | 87 | -1.18 | 0.24 | 2.78 | 1.01 | 55.2 |
| 4.31E-09 | 0.10 | 67 | -1.06 | 0.15 | 2.05 | 0.23 | 96.3 |
| 4.35E-09 | 0.18 | 33 | -0.92 | 0.36 | 2.40 | 0.55 | 99.5 |
| 4.40E-09 | 0.19 | 72 | -0.82 | 0.33 | 2.08 | 0.29 | 98.8 |
| 4.44E-09 | 0.08 | 70 | -1.10 | 0.19 | 2.20 | 0.45 | 94.6 |
| 4.45E-09 | 0.02 | 9  | -1.18 | 0.26 | 3.01 | 1.18 | 39.8 |
| 4.46E-09 | 0.18 | 23 | -0.94 | 0.23 | 2.08 | 0.29 | 98.8 |
| 4.46E-09 | 0.01 | 35 | -1.17 | 0.32 | 3.90 | 1.70 | 19.1 |
| 4.62E-09 | 0.16 | 15 | -0.97 | 0.25 | 2.07 | 0.26 | 98.5 |
| 4.62E-09 | 0.15 | 97 | -0.96 | 0.30 | 2.07 | 0.26 | 98.5 |
| 4.65E-09 | 0.03 | 33 | -1.16 | 0.22 | 2.73 | 1.00 | 52.9 |
| 4.66E-09 | 0.13 | 82 | -1.07 | 0.21 | 2.13 | 0.34 | 96.9 |
| 4.71E-09 | 0.08 | 82 | -1.12 | 0.20 | 2.26 | 0.54 | 91.4 |
| 4.76E-09 | 0.18 | 26 | -0.91 | 0.37 | 2.00 | 0.00 | 98.6 |
| 4.79E-09 | 0.19 | 1  | -0.91 | 0.35 | 2.13 | 0.35 | 99.2 |
| 4.81E-09 | 0.05 | 9  | -1.16 | 0.17 | 2.38 | 0.67 | 74.5 |
| 4.82E-09 | 0.00 | 61 | -0.87 | 0.55 | 7.52 | 3.23 | 1.1  |
| 4.91E-09 | 0.01 | 56 | -1.20 | 0.31 | 3.65 | 1.65 | 24.4 |
| 4.93E-09 | 0.01 | 98 | -1.17 | 0.39 | 5.51 | 2.45 | 5.8  |
| 4.94E-09 | 0.20 | 97 | -0.99 | 0.31 | 2.13 | 0.35 | 99.2 |
| 5.00E-09 | 0.04 | 2  | -1.15 | 0.21 | 2.41 | 0.76 | 72.2 |
| 5.07E-09 | 0.07 | 9  | -1.10 | 0.25 | 2.24 | 0.43 | 89.9 |
| 5.11E-09 | 0.13 | 68 | -1.09 | 0.19 | 2.12 | 0.41 | 96.6 |
| 5.12E-09 | 0.15 | 76 | -0.94 | 0.23 | 2.08 | 0.28 | 98.7 |
| 5.18E-09 | 0.01 | 45 | -1.20 | 0.30 | 3.78 | 1.75 | 18.7 |
| 5.23E-09 | 0.09 | 18 | -1.07 | 0.19 | 2.16 | 0.37 | 92.5 |
| 5.29E-09 | 0.10 | 95 | -1.04 | 0.20 | 2.10 | 0.37 | 95.1 |

|          |      |    |       |      |      |      |      |
|----------|------|----|-------|------|------|------|------|
| 5.32E-09 | 0.08 | 25 | -1.11 | 0.21 | 2.23 | 0.54 | 92.7 |
| 5.34E-09 | 0.09 | 34 | -1.09 | 0.19 | 2.17 | 0.41 | 92.4 |
| 5.38E-09 | 0.16 | 38 | -0.98 | 0.20 | 2.00 | 0.00 | 99.1 |
| 5.41E-09 | 0.19 | 14 | -0.80 | 0.30 | 2.00 | 0.00 | 99.1 |
| 5.48E-09 | 0.01 | 90 | -1.25 | 0.29 | 4.15 | 1.93 | 16.3 |
| 5.49E-09 | 0.02 | 51 | -1.23 | 0.27 | 3.56 | 1.55 | 24.3 |
| 5.50E-09 | 0.06 | 64 | -1.17 | 0.17 | 2.37 | 0.69 | 83.9 |
| 5.62E-09 | 0.04 | 63 | -1.18 | 0.21 | 2.61 | 0.90 | 63.8 |
| 5.69E-09 | 0.12 | 88 | -1.01 | 0.30 | 2.26 | 0.54 | 95.8 |
| 5.71E-09 | 0.08 | 65 | -1.10 | 0.20 | 2.16 | 0.39 | 90.5 |
| 5.75E-09 | 0.02 | 38 | -1.24 | 0.25 | 3.42 | 1.47 | 30.5 |
| 5.77E-09 | 0.15 | 39 | -0.98 | 0.28 | 2.05 | 0.22 | 97.9 |
| 5.90E-09 | 0.16 | 82 | -1.01 | 0.27 | 2.17 | 0.51 | 98.2 |
| 5.94E-09 | 0.13 | 32 | -1.00 | 0.26 | 2.17 | 0.45 | 96.5 |
| 5.95E-09 | 0.18 | 78 | -0.88 | 0.56 | 2.07 | 0.26 | 98.5 |
| 6.00E-09 | 0.09 | 85 | -1.10 | 0.20 | 2.17 | 0.43 | 90.2 |
| 6.01E-09 | 0.02 | 64 | -1.22 | 0.25 | 3.25 | 1.33 | 34   |
| 6.07E-09 | 0.15 | 98 | -0.98 | 0.22 | 2.09 | 0.29 | 96.6 |
| 6.09E-09 | 0.05 | 75 | -1.16 | 0.19 | 2.42 | 0.74 | 76.8 |
| 6.10E-09 | 0.08 | 73 | -1.12 | 0.24 | 2.34 | 0.60 | 88.1 |
| 6.11E-09 | 0.12 | 41 | -1.00 | 0.26 | 2.17 | 0.38 | 94.8 |
| 6.14E-09 | 0.13 | 4  | -0.99 | 0.27 | 2.09 | 0.29 | 96.6 |
| 6.17E-09 | 0.04 | 86 | -1.19 | 0.23 | 2.62 | 0.92 | 62.7 |
| 6.18E-09 | 0.16 | 10 | -1.01 | 0.27 | 2.09 | 0.29 | 97.8 |
| 6.19E-09 | 0.01 | 44 | -1.25 | 0.29 | 4.22 | 1.89 | 13.3 |
| 6.20E-09 | 0.13 | 16 | -1.10 | 0.16 | 2.15 | 0.36 | 95.9 |
| 6.20E-09 | 0.07 | 19 | -1.11 | 0.21 | 2.21 | 0.50 | 86.2 |
| 6.33E-09 | 0.06 | 36 | -1.16 | 0.19 | 2.41 | 0.77 | 82.5 |
| 6.35E-09 | 0.10 | 91 | -1.09 | 0.18 | 2.14 | 0.38 | 90.6 |
| 6.35E-09 | 0.17 | 93 | -0.85 | 0.34 | 2.10 | 0.30 | 96.9 |
| 6.39E-09 | 0.11 | 97 | -1.09 | 0.20 | 2.15 | 0.40 | 94   |
| 6.40E-09 | 0.05 | 14 | -1.17 | 0.20 | 2.54 | 0.80 | 68.9 |
| 6.42E-09 | 0.19 | 89 | -0.84 | 0.30 | 2.00 | 0.00 | 99   |
| 6.47E-09 | 0.06 | 82 | -1.16 | 0.18 | 2.45 | 0.76 | 79.6 |
| 6.52E-09 | 0.00 | 71 | -1.21 | 0.40 | 7.28 | 3.06 | 2.5  |
| 6.60E-09 | 0.03 | 24 | -1.24 | 0.24 | 3.25 | 1.36 | 37   |
| 6.61E-09 | 0.16 | 80 | -1.08 | 0.20 | 2.19 | 0.49 | 97.4 |
| 6.65E-09 | 0.09 | 70 | -1.12 | 0.21 | 2.29 | 0.68 | 88.7 |
| 6.75E-09 | 0.03 | 30 | -1.23 | 0.23 | 3.05 | 1.22 | 40.6 |
| 6.76E-09 | 0.18 | 95 | -0.90 | 0.28 | 2.04 | 0.20 | 97.6 |
| 6.80E-09 | 0.04 | 53 | -1.22 | 0.22 | 2.82 | 1.03 | 52.1 |
| 6.81E-09 | 0.14 | 10 | -0.93 | 0.32 | 2.05 | 0.22 | 96.1 |
| 6.82E-09 | 0.03 | 33 | -1.23 | 0.25 | 3.22 | 1.42 | 35.9 |
| 6.84E-09 | 0.02 | 46 | -1.26 | 0.26 | 3.51 | 1.56 | 29.3 |
| 6.88E-09 | 0.14 | 58 | -1.01 | 0.25 | 2.07 | 0.26 | 94.6 |
| 6.99E-09 | 0.11 | 9  | -1.05 | 0.24 | 2.23 | 0.45 | 92.6 |
| 7.01E-09 | 0.07 | 31 | -1.16 | 0.18 | 2.42 | 0.64 | 78.7 |
| 7.06E-09 | 0.19 | 25 | -1.03 | 0.24 | 2.08 | 0.28 | 98.7 |
| 7.08E-09 | 0.04 | 42 | -1.21 | 0.21 | 2.77 | 1.07 | 59.5 |
| 7.10E-09 | 0.11 | 82 | -1.09 | 0.23 | 2.22 | 0.45 | 92.8 |
| 7.11E-09 | 0.05 | 57 | -1.19 | 0.20 | 2.62 | 0.91 | 67.6 |
| 7.12E-09 | 0.10 | 32 | -1.09 | 0.21 | 2.20 | 0.42 | 89.3 |



|          |      |    |       |      |       |      |      |
|----------|------|----|-------|------|-------|------|------|
| 7.13E-09 | 0.15 | 87 | -0.96 | 0.23 | 2.14  | 0.35 | 95.6 |
| 7.18E-09 | 0.15 | 87 | -0.99 | 0.16 | 2.15  | 0.36 | 96.7 |
| 7.19E-09 | 0.19 | 90 | -0.77 | 0.45 | 2.08  | 0.28 | 97.6 |
| 7.21E-09 | 0.14 | 79 | -1.05 | 0.23 | 2.16  | 0.42 | 94.9 |
| 7.27E-09 | 0.00 | 77 | -1.02 | 0.53 | 10.99 | 3.96 | 0.2  |
| 7.30E-09 | 0.11 | 12 | -1.04 | 0.22 | 2.17  | 0.38 | 92.4 |
| 7.37E-09 | 0.07 | 70 | -1.15 | 0.20 | 2.44  | 0.68 | 80   |
| 7.38E-09 | 0.18 | 10 | -0.92 | 0.37 | 2.24  | 0.56 | 98.3 |
| 7.38E-09 | 0.08 | 69 | -1.11 | 0.21 | 2.31  | 0.61 | 83.4 |
| 7.38E-09 | 0.07 | 67 | -1.15 | 0.21 | 2.46  | 0.69 | 83.3 |
| 7.42E-09 | 0.18 | 15 | -0.99 | 0.23 | 2.14  | 0.35 | 97.8 |
| 7.51E-09 | 0.14 | 66 | -1.03 | 0.21 | 2.13  | 0.40 | 95.3 |
| 7.51E-09 | 0.03 | 99 | -1.25 | 0.25 | 3.35  | 1.46 | 32.4 |
| 7.54E-09 | 0.08 | 13 | -1.16 | 0.20 | 2.47  | 0.79 | 81.9 |
| 7.65E-09 | 0.08 | 47 | -1.11 | 0.20 | 2.30  | 0.51 | 83.9 |
| 7.65E-09 | 0.03 | 18 | -1.22 | 0.25 | 2.99  | 1.19 | 43.7 |
| 7.66E-09 | 0.03 | 8  | -1.27 | 0.25 | 3.42  | 1.57 | 32.4 |
| 7.68E-09 | 0.01 | 72 | -1.33 | 0.31 | 5.85  | 2.56 | 5.1  |
| 7.69E-09 | 0.08 | 30 | -1.14 | 0.21 | 2.39  | 0.64 | 82.1 |
| 7.69E-09 | 0.19 | 90 | -0.99 | 0.21 | 2.00  | 0.00 | 97.7 |
| 7.72E-09 | 0.16 | 75 | -0.94 | 0.29 | 2.08  | 0.28 | 96.3 |
| 7.75E-09 | 0.01 | 47 | -1.31 | 0.35 | 7.82  | 3.34 | 0.9  |
| 7.81E-09 | 0.09 | 44 | -1.12 | 0.19 | 2.27  | 0.55 | 86.8 |
| 7.87E-09 | 0.11 | 7  | -1.06 | 0.21 | 2.23  | 0.51 | 89.3 |
| 7.93E-09 | 0.20 | 50 | -0.99 | 0.32 | 2.17  | 0.38 | 97.6 |
| 8.00E-09 | 0.01 | 81 | -1.34 | 0.34 | 6.96  | 2.99 | 2.8  |
| 8.01E-09 | 0.19 | 25 | -0.90 | 0.39 | 2.21  | 0.42 | 98.1 |
| 8.07E-09 | 0.11 | 65 | -1.08 | 0.20 | 2.17  | 0.44 | 89.1 |
| 8.14E-09 | 0.13 | 76 | -1.02 | 0.25 | 2.14  | 0.35 | 94.3 |
| 8.17E-09 | 0.08 | 23 | -1.14 | 0.22 | 2.43  | 0.73 | 78.5 |
| 8.18E-09 | 0.05 | 67 | -1.20 | 0.21 | 2.64  | 0.89 | 61.3 |
| 8.24E-09 | 0.02 | 74 | -1.28 | 0.25 | 3.58  | 1.64 | 25.3 |
| 8.27E-09 | 0.09 | 54 | -1.14 | 0.16 | 2.33  | 0.61 | 85.1 |
| 8.31E-09 | 0.08 | 64 | -1.12 | 0.25 | 2.42  | 0.80 | 82.8 |
| 8.31E-09 | 0.19 | 49 | -0.90 | 0.30 | 2.04  | 0.20 | 97.4 |
| 8.35E-09 | 0.19 | 37 | -0.84 | 0.40 | 2.07  | 0.26 | 97.2 |
| 8.41E-09 | 0.18 | 52 | -0.98 | 0.26 | 2.07  | 0.26 | 97.2 |
| 8.42E-09 | 0.17 | 75 | -0.97 | 0.28 | 2.14  | 0.35 | 97.1 |
| 8.43E-09 | 0.17 | 50 | -0.97 | 0.27 | 2.14  | 0.36 | 96.5 |
| 8.43E-09 | 0.20 | 54 | -0.92 | 0.25 | 2.10  | 0.30 | 96.9 |
| 8.45E-09 | 0.07 | 25 | -1.14 | 0.20 | 2.49  | 0.82 | 74.4 |
| 8.45E-09 | 0.19 | 93 | -1.00 | 0.26 | 2.06  | 0.25 | 96.9 |
| 8.46E-09 | 0.13 | 44 | -1.06 | 0.23 | 2.16  | 0.42 | 94.4 |
| 8.48E-09 | 0.07 | 80 | -1.14 | 0.21 | 2.40  | 0.72 | 78.3 |
| 8.51E-09 | 0.05 | 17 | -1.19 | 0.19 | 2.61  | 0.83 | 64.3 |
| 8.55E-09 | 0.18 | 45 | -0.89 | 0.38 | 2.13  | 0.34 | 97.7 |
| 8.60E-09 | 0.15 | 82 | -1.04 | 0.23 | 2.16  | 0.37 | 95   |
| 8.61E-09 | 0.11 | 73 | -1.09 | 0.23 | 2.29  | 0.56 | 89   |
| 8.63E-09 | 0.16 | 48 | -0.91 | 0.33 | 2.02  | 0.15 | 95.5 |
| 8.64E-09 | 0.06 | 10 | -1.20 | 0.21 | 2.64  | 0.89 | 66.2 |
| 8.74E-09 | 0.01 | 46 | -1.36 | 0.34 | 6.85  | 2.96 | 2.1  |
| 8.79E-09 | 0.00 | 3  | -0.96 | 0.48 | 13.71 | 4.39 | 0.1  |

|          |      |    |       |      |      |      |      |
|----------|------|----|-------|------|------|------|------|
| 8.88E-09 | 0.03 | 34 | -1.29 | 0.24 | 3.49 | 1.51 | 30.1 |
| 8.88E-09 | 0.04 | 24 | -1.26 | 0.22 | 3.07 | 1.25 | 41.8 |
| 8.91E-09 | 0.12 | 80 | -1.05 | 0.26 | 2.28 | 0.66 | 91.4 |
| 8.92E-09 | 0.14 | 43 | -1.01 | 0.28 | 2.30 | 0.60 | 94.3 |
| 8.93E-09 | 0.11 | 5  | -1.08 | 0.20 | 2.24 | 0.48 | 87.4 |
| 8.98E-09 | 0.03 | 35 | -1.27 | 0.24 | 3.35 | 1.37 | 32.7 |
| 8.98E-09 | 0.12 | 71 | -0.99 | 0.28 | 2.16 | 0.39 | 90.5 |
| 8.99E-09 | 0.06 | 15 | -1.17 | 0.20 | 2.50 | 0.78 | 70.2 |
| 2.87E-09 | 0.17 | 51 | NA    | NA   | NA   | NA   | 100  |
| 4.71E-09 | 0.11 | 51 | NA    | NA   | NA   | NA   | 100  |
| 8.13E-09 | 0.09 | 55 | NA    | NA   | NA   | NA   | 100  |
| 2.26E-09 | 0.05 | 87 | NA    | NA   | NA   | NA   | 100  |
| 2.35E-09 | 0.16 | 46 | NA    | NA   | NA   | NA   | 100  |
| 1.28E-09 | 0.17 | 95 | NA    | NA   | NA   | NA   | 100  |
| 3.20E-09 | 0.16 | 31 | NA    | NA   | NA   | NA   | 100  |
| 3.32E-09 | 0.07 | 43 | NA    | NA   | NA   | NA   | 100  |
| 7.12E-09 | 0.05 | 13 | NA    | NA   | NA   | NA   | 100  |
| 8.34E-09 | 0.11 | 88 | NA    | NA   | NA   | NA   | 100  |
| 2.45E-09 | 0.19 | 51 | NA    | NA   | NA   | NA   | 100  |

92

93 \*NA = Could NOT be estimated. Total of simulations were invariable genomes.
